# Supplementary material for: In silico prediction of pesticide aquatic toxicity with chemical category approaches
Source: Royal Society of Chemistry journal article supplement (doi:10.1039/c7tx00144d), 2017-01-01
Supplement: c7tx00144d1.xlsx [file c7tx00144d1.xlsx]

## Sheet: RT_train
SI1: SMILES and Classification of all collected compounds
RT_train
No.	CAS No.	SMILES	Toxicity (mg/L)	Classification
1	79538-32-2	Cl\C(=C/C2C(C(=O)OCc1c(F)c(F)c(c(F)c1F)C)C2(C)C)C(F)(F)F	6e-05	Very highly toxic
2	82657-04-3	Cl\C(=C/C3C(C(=O)OCc2cccc(c1ccccc1)c2C)C3(C)C)C(F)(F)F	0.00026	Very highly toxic
3	52918-63-5	Br/C(Br)=C/[C@H]3[C@@H](C(=O)O[C@H](C#N)c2cccc(Oc1ccccc1)c2)C3(C)C	0.00026	Very highly toxic
4	39515-40-7	N#CC(OC(=O)C1C(/C=C(/C)C)C1(C)C)c3cccc(Oc2ccccc2)c3	0.00034	Very highly toxic
5	68359-37-5	Cl/C(Cl)=C/C3C(C(=O)OC(C#N)c2ccc(F)c(Oc1ccccc1)c2)C3(C)C	0.00047	Very highly toxic
6	28434-01-7	O=C(OCc1cc(oc1)Cc2ccccc2)C3C(\C=C(/C)C)C3(C)C	0.00062	Very highly toxic
7	96489-71-3	O=C2C(\Cl)=C(\SCc1ccc(cc1)C(C)(C)C)/C=N\N2C(C)(C)C	0.0007	Very highly toxic
8	80060-09-9	S=C(NC(C)(C)C)Nc2c(cc(Oc1ccccc1)cc2C(C)C)C(C)C	0.0007	Very highly toxic
9	102851-06-9	Clc3cc(ccc3N[C@@H](C(=O)OC(C#N)c2cccc(Oc1ccccc1)c2)C(C)C)C(F)(F)F	0.000794	Very highly toxic
10	13356-08-6	CC(C)(C[Sn](CC(C)(C)c1ccccc1)(CC(C)(C)c2ccccc2)O[Sn](CC(C)(C)c3ccccc3)(CC(C)(C)c4ccccc4)CC(C)(C)c5ccccc5)c6ccccc6	0.00114	Very highly toxic
11	60-57-1	C1[C@@H]2[C@H]3[C@@H]([C@H]1[C@H]4[C@@H]2O4)[C@]5(C(=C([C@@]3(C5(Cl)Cl)Cl)Cl)Cl)Cl	0.0012	Very highly toxic
12	609346-29-4	CC(=CC1C(C1(C)C)C(=O)OCc2c(c(c(c(c2F)F)COC)F)F)C#N	0.0012	Very highly toxic
13	97-17-6	Clc1cc(Cl)ccc1OP(=S)(OCC)OCC	0.00125	Very highly toxic
14	2921-88-2	Clc1c(OP(=S)(OCC)OCC)nc(Cl)c(Cl)c1	0.0013	Very highly toxic
15	66841-25-6	C(Br)(C(Br)(Br)Br)C1C(C)(C)C1C(=O)OC(C#N)c1cccc(c1)Oc1ccccc1	0.0016	Very highly toxic
16	959-98-8	C1[C@@H]2[C@H](CO[S@@](=O)O1)[C@]3(C(=C([C@@]2(C3(Cl)Cl)Cl)Cl)Cl)Cl	0.002	Very highly toxic
17	115-29-7	Cl\C1=C(/Cl)C3(Cl)C(Cl)(Cl)C1(Cl)C2C3COS(=O)OC2	0.002	Very highly toxic
18	21564-17-0	c12c(sc(n1)SCSC#N)cccc2	0.0021	Very highly toxic
19	39515-41-8	O=C(OC(C#N)c2cccc(Oc1ccccc1)c2)C3C(C)(C)C3(C)C	0.0023	Very highly toxic
20	80844-07-1	O(c1ccccc1)c2cc(ccc2)COCC(c3ccc(OCC)cc3)(C)C	0.0027	Very highly toxic
21	14437-17-3	Clc1ccc(cc1)CC(Cl)C(=O)OC	0.0027	Very highly toxic
22	26002-80-2	CC(=CC1C(C1(C)C)C(=O)OCC2=CC(=CC=C2)OC3=CC=CC=C3)C	0.0027	Very highly toxic
23	67375-30-8	CC1(C(C1C(=O)O[C@@H](C#N)c2cccc(c2)Oc3ccccc3)C=C(Cl)Cl)C	0.0028	Very highly toxic
24	52315-07-8	CC1(C(C1C(=O)OC(C#N)c2cccc(c2)Oc3ccccc3)C=C(Cl)Cl)C	0.0028	Very highly toxic
25	58-89-9	ClC1C(Cl)C(Cl)C(Cl)C(Cl)C1Cl	0.0029	Very highly toxic
26	1420-07-1	[O-][N+](=O)c1cc(cc(c1O)C(C)(C)C)[N+]([O-])=O	0.0034	Very highly toxic
27	51630-58-1	Clc1ccc(cc1)C(C(=O)OC(C#N)c3cccc(Oc2ccccc2)c3)C(C)C	0.0036	Very highly toxic
28	3689-24-5	S=P(OP(=S)(OCC)OCC)(OCC)OCC	0.00361	Very highly toxic
29	41083-11-8	[n-]1ncnc1.[Sn+](C1CCCCC1)(C2CCCCC2)C3CCCCC3	0.004	Very highly toxic
30	76-06-2	ClC(Cl)(Cl)[N+]([O-])=O	0.0048	Very highly toxic
31	101463-69-8	Clc3cc(ccc3Oc2ccc(NC(=O)NC(=O)c1c(F)cccc1F)c(F)c2)C(F)(F)F	0.0049	Very highly toxic
32	13593-03-8	S=P(OCC)(OCC)Oc1nc2ccccc2nc1	0.005	Very highly toxic
33	42509-80-8	CCOP(=S)(OCC)Oc1nc(Cl)n(n1)C(C)C	0.006	Very highly toxic
34	101007-06-1	O=C(OC(C(F)(F)F)C(F)(F)F)\C=C\C3C(C(=O)OC(C#N)c2cccc(Oc1ccccc1)c2)C3(C)C	0.0061	Very highly toxic
35	7803-51-2	P	0.007	Very highly toxic
36	122453-73-0	Clc2ccc(c1c(C#N)c(Br)c(n1COCC)C(F)(F)F)cc2	0.007	Very highly toxic
37	12057-74-8	[Mg+2].[Mg+2].[Mg+2].[PH6-3].[PH6-3]	0.0093	Very highly toxic
38	22224-92-6	O=P(OCC)(Oc1ccc(SC)c(c1)C)NC(C)C	0.0093	Very highly toxic
39	20859-73-8	[Al]#P	0.0097	Very highly toxic
40	1085-98-9	O=S(=O)(N(SC(Cl)(Cl)F)c1ccccc1)N(C)C	0.01	Very highly toxic
41	131807-57-3	O=C2OC(C(=O)N2Nc1ccccc1)(c4ccc(Oc3ccccc3)cc4)C	0.011	Very highly toxic
42	21609-90-5	c1([P@@](Oc2c(cc(Br)c(c2)Cl)Cl)(OC)=S)ccccc1	0.011	Very highly toxic
43	62-38-4	c1([Hg]OC(C)=O)ccccc1	0.011	Very highly toxic
44	23031-36-9	C1([C@H]([C@@H]1C(O[C@@H]1C(=C(CC#C)C(C1)=O)C)=O)\C=C(\C)C)(C)C	0.012	Very highly toxic
45	7786-34-7	O=P(O/C(=C/C(=O)OC)C)(OC)OC	0.012	Very highly toxic
46	52645-53-1	c3ccccc3Oc(c2)cccc2COC(=O)C1C(C1(C)C)C=C(Cl)Cl	0.0125	Very highly toxic
47	298-02-2	S=P(OCC)(SCSCC)OCC	0.013	Very highly toxic
48	973-21-7	O=C(Oc1c(cc(cc1C(C)CC)[N+]([O-])=O)[N+]([O-])=O)OC(C)C	0.014	Very highly toxic
49	141517-21-7	FC(F)(F)c1cccc(c1)\C(=N\OCc2ccccc2C(=N\OC)\C(=O)OC)C	0.015	Very highly toxic
50	283594-90-1	O=C(O\C1=C(\C(=O)OC12CCCC2)c3c(cc(cc3C)C)C)CC(C)(C)C	0.016	Very highly toxic
51	18181-70-9	Clc1cc(I)c(Cl)cc1OP(=S)(OC)OC	0.016	Very highly toxic
52	150-50-5	S(P(SCCCC)SCCCC)CCCC	0.016	Very highly toxic
53	20427-59-2	[Cu+2].[OH-].[OH-]	0.017	Very highly toxic
54	121-75-5	O=C(OCC)C(SP(=S)(OC)OC)CC(=O)OCC	0.018	Very highly toxic
55	1024-57-3	Cl\C1=C(/Cl)C2(Cl)C(Cl)(Cl)C1(Cl)C4C2C3OC3C4Cl	0.02	Very highly toxic
56	143-50-0	ClC54C(=O)C1(Cl)C2(Cl)C5(Cl)C3(Cl)C4(Cl)C1(Cl)C2(Cl)C3(Cl)Cl	0.02	Very highly toxic
57	7722-84-1	OO	0.022	Very highly toxic
58	119168-77-3	Clc2c(nn(c2C(=O)NCc1ccc(cc1)C(C)(C)C)C)CC	0.023	Very highly toxic
59	38260-54-7	CCOc1cc(OP(=S)(OC)OC)nc(CC)n1	0.024	Very highly toxic
60	130339-07-0	Clc2c(NC(CC)c1ccc(OC(F)F)cc1)ncnc2C	0.025	Very highly toxic
61	118-74-1	Clc1=c(Cl)c(Cl)=c(Cl)c(Cl)=c1Cl	0.03	Very highly toxic
62	65907-30-4	O=C(OCCCC)N(SN(C(=O)Oc2cccc1c2OC(C1)(C)C)C)C	0.03	Very highly toxic
63	72-55-9	Clc2ccc(\C(=C(/Cl)Cl)c1ccc(Cl)cc1)cc2	0.032	Very highly toxic
64	148477-71-8	CC(C)(CC)C(=O)O\C2=C(\C(=O)OC12CCCCC1)c3cc(Cl)cc(Cl)c3	0.035	Very highly toxic
65	82560-54-1	O=C(OCC)CCN(SN(C(=O)Oc2cccc1c2OC(C1)(C)C)C)C(C)C	0.038	Very highly toxic
66	1897-45-6	Clc1c(C#N)c(Cl)c(C#N)c(Cl)c1Cl	0.038	Very highly toxic
67	72963-72-5	O=C(OCN1C(=O)CN(C1=O)CC#C)C2C(\C=C(/C)C)C2(C)C	0.038	Very highly toxic
68	24017-47-8	CCOP(=S)(OCC)OC1=NN(C=N1)C2=CC=CC=C2	0.038	Very highly toxic
69	43210-67-9	c12c([nH]c(n2)NC(=O)OC)ccc(c1)Sc1ccccc1	0.04	Very highly toxic
70	31895-22-4	O=C(O)C(=O)O.S1SSCC(N(C)C)C1	0.04	Very highly toxic
71	31895-21-3	S1SSCC(N(C)C)C1	0.04	Very highly toxic
72	134098-61-6	O=C(OC(C)(C)C)c1ccc(cc1)CO\N=C\c3c(nn(c3Oc2ccccc2)C)C	0.041	Very highly toxic
73	62-53-3	NC1=CC=CC=C1	0.041	Very highly toxic
74	2312-35-8	O=S(OCC#C)OC2CCCCC2Oc1ccc(cc1)C(C)(C)C	0.043	Very highly toxic
75	117337-19-6	n12CCCCn1c(=O)s\c2=N/c1c(cc(c(c1)SCC(=O)OC)Cl)F	0.043	Very highly toxic
76	149961-52-4	O=C(NC)\C(=N\OC)c1c(cccc1)COc2cc(ccc2C)C	0.0434	Very highly toxic
77	174514-07-9	CC(C)OC(=O)c1cc(c2nn(C)c(c2Br)C(F)(F)F)c(F)cc1Cl	0.045	Very highly toxic
78	137-26-8	S=C(SSC(=S)N(C)C)N(C)C	0.046	Very highly toxic
79	495-73-8	O=Nc2ccc(NNC(=O)c1ccccc1)cc2	0.048	Very highly toxic
80	485-31-4	O=C(Oc1c(cc(cc1C(C)CC)[N+]([O-])=O)[N+]([O-])=O)\C=C(/C)C	0.05	Very highly toxic
81	2227-17-0	ClC1(C(/Cl)=C(/Cl)\C(\Cl)=C1\Cl)C2(Cl)C(\Cl)=C(\Cl)C(\Cl)=C2\Cl	0.05	Very highly toxic
82	104653-34-1	Brc1ccc(cc1)c2ccc(cc2)C6Cc3ccccc3C(C=4C(=O)c5c(SC=4O)cccc5)C6	0.051	Very highly toxic
83	56073-10-0	C1C(CC2=CC=CC=C2C1C3=C(OC4=CC=CC=C4C3=O)O)C5=CC=C(C=C5)C6=CC=C(C=C6)Br	0.051	Very highly toxic
84	348635-87-0	O=S(=O)(c1ncn(n1)S(=O)(=O)N(C)C)n3c2cc(F)ccc2c(Br)c3C	0.0515	Very highly toxic
85	556-61-6	CN=C=S	0.0531	Very highly toxic
86	786-19-6	COP(=S)(OC)SCSC1=CC=C(C=C1)Cl	0.056	Very highly toxic
87	272451-65-7	O=C(Nc1ccc(cc1C)C(F)(C(F)(F)F)C(F)(F)F)c2cccc(I)c2C(=O)NC(C)(C)CS(C)(=O)=O	0.06	Very highly toxic
88	7704-34-9	S	0.063	Very highly toxic
89	865318-97-4	n1c(c(c(n2ncnc12)N)CCCCCCCC)CC	0.065	Very highly toxic
90	26530-20-1	O=C1/C=C\SN1CCCCCCCC	0.065	Very highly toxic
91	4097-33-0	c1(c(cc(cc1CCCCCCCC)[N+](=O)[O-])[N+](=O)[O-])O	0.067	Very highly toxic
92	3347-22-6	N#CC=1S\C2=C(/SC=1C#N)C(=O)c3c(C2=O)cccc3	0.07	Very highly toxic
93	8018-01-7	[Mn+2].[Zn+2].[S-]C(=S)NCCNC(=S)[S-].[S-]C(=S)NCCNC([S-])=S	0.074	Very highly toxic
94	117428-22-5	FC(F)(F)c2nc(OCc1ccccc1C(=C\OC)/C(=O)OC)ccc2	0.075	Very highly toxic
95	103112-36-3	Clc1cc(Cl)ccc1n1nc(C(O)=O)nc1C(Cl)(Cl)Cl	0.08	Very highly toxic
96	2642-71-9	S=P(OCC)(OCC)SCN1\N=N/c2ccccc2C1=O	0.08	Very highly toxic
97	103112-35-2	C(c1nc(n(n1)c1c(cc(cc1)Cl)Cl)C(Cl)(Cl)Cl)(=O)OCC	0.08	Very highly toxic
98	1861-40-1	[O-][N+](=O)c1cc(cc([N+]([O-])=O)c1N(CCCC)CC)C(F)(F)F	0.081	Very highly toxic
99	1582-09-8	[O-][N+](=O)c1cc(cc([N+]([O-])=O)c1N(CCC)CCC)C(F)(F)F	0.088	Very highly toxic
100	54593-83-8	CCOP(=S)(OCC)OC(C(Cl)(Cl)Cl)Cl	0.089	Very highly toxic
101	90035-08-8	FC(F)(F)c1ccc(cc1)COc2ccc(cc2)C6Cc3ccccc3C(C=4C(=O)c5c(OC=4O)cccc5)C6	0.091	Very highly toxic
102	581809-46-3	c1cc(c(cc1c1c(ccc(c1)F)NC(=O)c1cn(nc1C(F)F)C)Cl)Cl	0.095	Very highly toxic
103	101-05-3	Clc1nc(nc(Cl)n1)Nc2ccccc2Cl	0.095	Very highly toxic
104	123-31-9	OC1=CC=C(C=C1)O	0.097	Very highly toxic
105	4234-79-1	C12([C@@]3([C@@]4(C([C@@]5(Cl)C4(Cl)C(C3(Cl)[C@@]15Cl)(Cl)Cl)(Cl)C2(CC(CCC(OCC)=O)=O)O)Cl)Cl)Cl	0.1	Highly toxic
106	2104-64-5	S=P(Oc1ccc(cc1)[N+]([O-])=O)(OCC)c2ccccc2	0.11	Highly toxic
107	91-20-3	c12ccccc1cccc2	0.11	Highly toxic
108	35575-96-3	O=P(OC)(OC)SCN1c2ncc(Cl)cc2OC1=O	0.115	Highly toxic
109	95465-99-9	O=P(SC(CC)C)(OCC)SC(CC)C	0.13	Highly toxic
110	35367-38-5	Clc2ccc(NC(=O)NC(=O)c1c(F)cccc1F)cc2	0.13	Highly toxic
111	39196-18-4	O=C(O\N=C(/C(C)(C)C)CSC)NC	0.13	Highly toxic
112	55283-68-6	CCN(CC(=C)C)C1=C(C=C(C=C1[N+](=O)[O-])C(F)(F)F)[N+](=O)[O-]	0.136	Highly toxic
113	106-99-0	C(C=C)=C	0.15	Highly toxic
114	107-02-8	O=C\C=C	0.15	Highly toxic
115	156052-68-5	Clc1cc(cc(Cl)c1C)C(=O)NC(C(=O)CCl)(C)CC	0.16	Highly toxic
116	67485-29-4	FC(F)(F)c1ccc(cc1)\C=C\C(=N/N/C2=N/CC(C)(C)CN2)/C=C/c3ccc(cc3)C(F)(F)F	0.16	Highly toxic
117	87-86-5	Clc1c(Cl)c(Cl)c(Cl)c(Cl)c1O	0.17	Highly toxic
118	1918-16-7	ClCC(=O)N(c1ccccc1)C(C)C	0.17	Highly toxic
119	7681-52-9	Cl[O-].[Na+]	0.18	Highly toxic
120	13181-17-4	C1=CC(=C(C=C1[N+](=O)[O-])[N+](=O)[O-])ONC=C2C=C(C(=O)C(=C2)Br)Br	0.18	Highly toxic
121	40843-73-0	O(c1c(cc(cc1)Cl)Cl)c1ccc(O)cc1	0.189	Highly toxic
122	10605-21-7	COC(=O)NC1=NC2=CC=CC=C2N1	0.19	Highly toxic
123	143390-89-0	O=C(OC)\C(=N\OC)c1c(cccc1)COc2ccccc2C	0.19	Highly toxic
124	608-93-5	Clc1cc(Cl)c(Cl)c(Cl)c1Cl	0.19	Highly toxic
125	300-76-5	ClC(Br)(Cl)C(Br)OP(=O)(OC)OC	0.195	Highly toxic
126	12427-38-2	[Mn+2].[S-]C(=S)NCCNC(=S)[S-]	0.2	Highly toxic
127	327-98-0	CCOP(=S)(CC)OC1=CC(=C(C=C1Cl)Cl)Cl	0.2	Highly toxic
128	39807-15-3	O=C2O\C(=N/N2c1c(Cl)cc(Cl)c(OCC#C)c1)C(C)(C)C	0.201	Highly toxic
129	83-26-1	CC(C)(C)C(=O)C1C(=O)c2ccccc2C1=O	0.21	Highly toxic
130	81406-37-3	Fc1nc(OCC(=O)OC(C)CCCCCC)c(Cl)c(c1Cl)N	0.225	Highly toxic
131	139968-49-3	C(=N/NC(Nc1ccc(cc1)OC(F)(F)F)=O)(\Cc1ccc(cc1)C#N)c1cc(C(F)(F)F)ccc1	0.228	Highly toxic
132	131341-86-1	N#Cc3cncc3c1cccc2OC(F)(F)Oc12	0.23	Highly toxic
133	133-07-3	N1(C(c2ccccc2C1=O)=O)SC(Cl)(Cl)Cl	0.233	Highly toxic
134	6317-18-6	C(SC#N)SC#N	0.24	Highly toxic
135	142-59-6	[Na+].[Na+].[S-]C(=S)NCCNC(=S)[S-]	0.24	Highly toxic
136	7447-39-4	Cl[Cu]Cl	0.24	Highly toxic
137	42874-03-3	Clc2cc(ccc2Oc1ccc([N+]([O-])=O)c(OCC)c1)C(F)(F)F	0.25	Highly toxic
138	124495-18-7	Fc3ccc(Oc1c2c(Cl)cc(Cl)cc2ncc1)cc3	0.27	Highly toxic
139	14255-88-0	FC(F)(F)c2nc1cc(Cl)c(Cl)cc1n2C(=O)Oc3ccccc3	0.29	Highly toxic
140	66063-05-6	Clc1ccc(cc1)CN(C(=O)Nc2ccccc2)C3CCCC3	0.3	Highly toxic
141	104-40-5	c1(ccc(O)cc1)CCCCCCCCC	0.3	Highly toxic
142	256412-89-2	c1c(N(C)C(=O)[C@H](Oc2ccc(cc2)Oc2nc3ccc(cc3o2)Cl)C)c(ccc1)F	0.307	Highly toxic
143	51338-27-3	Clc2cc(Cl)ccc2Oc1ccc(OC(C(=O)OC)C)cc1	0.31	Highly toxic
144	2631-37-0	CC1=CC(=CC(=C1)OC(=O)NC)C(C)C	0.31	Highly toxic
145	140-57-8	c1(ccc(C(C)(C)C)cc1)OC[C@@H](O[S@@](OCCCl)=O)C	0.32	Highly toxic
146	9006-42-2	C(CNC(=S)[S-])NC(=S)[S-].[Zn+2]	0.33	Highly toxic
147	69327-76-0	O=C2N(C(=N/C(C)(C)C)/SCN2c1ccccc1)C(C)C	0.33	Highly toxic
148	163520-33-0	C1(C(OCC)=O)=NOC(C1)(c1ccccc1)c1ccccc1	0.34	Highly toxic
149	189278-12-4	n1(CCC)c(c2cc(ccc2nc1OCCC)I)=O	0.349	Highly toxic
150	18181-80-1	CC(C)OC(=O)C(C1=CC=C(C=C1)Br)(C2=CC=C(C=C2)Br)O	0.35	Highly toxic
151	34256-82-1	ClCC(=O)N(c1c(cccc1CC)C)COCC	0.36	Highly toxic
152	239110-15-7	Clc2cccc(Cl)c2C(=O)NCc1ncc(cc1Cl)C(F)(F)F	0.36	Highly toxic
153	33629-47-9	CCC(C)NC1=C(C=C(C=C1[N+](=O)[O-])C(C)(C)C)[N+](=O)[O-]	0.37	Highly toxic
154	117-18-0	Clc1c([N+]([O-])=O)c(Cl)c(Cl)cc1Cl	0.37	Highly toxic
155	99-65-0	[O-][N+](=O)C1=CC(=CC=C1)[N+]([O-])=O	0.37	Highly toxic
156	135158-54-2	OC(=S)c1cccc2nnsc12	0.4	Highly toxic
157	62610-77-9	S=P(OC)(OC)O\C=C(/C)C(=O)OC	0.4	Highly toxic
158	29232-93-7	S=P(OC)(OC)Oc1nc(nc(c1)C)N(CC)CC	0.404	Highly toxic
159	5598-13-0	Clc1c(OP(=S)(OC)OC)nc(Cl)c(Cl)c1	0.41	Highly toxic
160	112143-82-5	O=C(n1nc(nc1SCC(=O)OCC)C(C)(C)C)N(C)C	0.43	Highly toxic
161	17109-49-8	O=P(Sc1ccccc1)(Sc2ccccc2)OCC	0.43	Highly toxic
162	361377-29-9	Clc4ccccc4Oc3ncnc(Oc2ccccc2C(=N\OC)/C=1OCCON=1)c3F	0.435	Highly toxic
163	4104-14-7	Clc2ccc(OP(=S)(/N=C(/N)C)Oc1ccc(Cl)cc1)cc2	0.44	Highly toxic
164	3691-35-8	Clc1ccc(cc1)C(c2ccccc2)C(=O)C4C(=O)c3ccccc3C4=O	0.45	Highly toxic
165	5836-10-2	Clc1ccc(cc1)C(O)(c2ccc(Cl)cc2)C(=O)OC(C)C	0.45	Highly toxic
166	131860-33-8	O=C(OC)\C(=C\OC)c3ccccc3Oc2ncnc(Oc1c(C#N)cccc1)c2	0.47	Highly toxic
167	99-30-9	Clc1cc(cc(Cl)c1N)[N+]([O-])=O	0.48	Highly toxic
168	58138-08-2	ClC(Cl)(Cl)CC1(OC1)c2cc(Cl)cc(Cl)c2	0.48	Highly toxic
169	95-95-4	Clc1cc(O)c(Cl)cc1Cl	0.49	Highly toxic
170	90640-80-5	c3ccc2cc1ccccc1cc2c3	0.49	Highly toxic
171	179101-81-6	c1c(cc(c(c1Cl)OCCCOc1cccc(n1)C(F)(F)F)Cl)OC\C=C(\Cl)Cl	0.5	Highly toxic
172	41205-09-8	O=C(OCC)\C=C(\C=C\CC(C)CCCC(C)C)C	0.5	Highly toxic
173	2425-06-1	C1=CCC2C(C1)C(N(C2=O)SC(Cl)(Cl)Cl)=O	0.5	Highly toxic
174	34643-46-4	Clc1cc(Cl)ccc1OP(=S)(OCC)SCCC	0.5	Highly toxic
175	97-23-4	Clc1cc(c(O)cc1)Cc2cc(Cl)ccc2O	0.54	Highly toxic
176	907204-31-3	c1(c(cccc1)c1cc(c(c(c1)F)F)F)NC(=O)c1cn(nc1C(F)F)C	0.546	Highly toxic
177	148-79-8	n2c1c(cccc1)nc2c3ncsc3	0.55	Highly toxic
178	10311-84-9	CCOP(=S)(OCC)SC(CCl)N1C(=O)C2=CC=CC=C2C1=O	0.55	Highly toxic
179	15457-05-3	[O-][N+](=O)c2ccc(Oc1ccc(cc1[N+]([O-])=O)C(F)(F)F)cc2	0.554	Highly toxic
180	116-06-3	O=C(O\N=C\C(SC)(C)C)NC	0.56	Highly toxic
181	99387-89-0	FC(F)(F)c2c(\N=C(\n1ccnc1)COCCC)ccc(Cl)c2	0.57	Highly toxic
182	2439-10-3	O=C(O)C.N(=C(\N)N)\CCCCCCCCCCCC	0.57	Highly toxic
183	3740-92-9	Clc1nc(nc(Cl)c1)c2ccccc2	0.6	Highly toxic
184	2310-17-0	Clc2ccc1c(OC(=O)N1CSP(=S)(OCC)OCC)c2	0.63	Highly toxic
185	173584-44-6	FC(F)(F)Oc1ccc(cc1)N(C(=O)OC)C(=O)N3/N=C4/c2c(cc(Cl)cc2)C[C@@]4(OC3)C(=O)OC	0.65	Highly toxic
186	2032-65-7	O=C(Oc1cc(c(SC)c(c1)C)C)NC	0.65	Highly toxic
187	79127-80-3	O=C(OCC)NCCOc2ccc(Oc1ccccc1)cc2	0.66	Highly toxic
188	571-58-4	c12c(c(ccc1C)C)cccc2	0.67	Highly toxic
189	42576-02-3	Clc2cc(Cl)ccc2Oc1cc(C(=O)OC)c([N+]([O-])=O)cc1	0.67	Highly toxic
190	86598-92-7	Clc3ccc(/N=C(\SCc1ccc(Cl)cc1)Cn2ncnc2)c(Cl)c3	0.67	Highly toxic
191	137641-05-5	C1=CC(=CC(=C1)OC2=CC=CC(=N2)C(=O)NC3=CC=C(C=C3)F)C(F)(F)F	0.68	Highly toxic
192	57018-04-9	Clc1cc(cc(Cl)c1OP(=S)(OC)OC)C	0.69	Highly toxic
193	52-68-6	COP(=O)(C(C(Cl)(Cl)Cl)O)OC	0.7	Highly toxic
194	510-15-6	Clc1ccc(cc1)C(O)(c2ccc(Cl)cc2)C(=O)OCC	0.7	Highly toxic
195	110235-47-7	n1c(C#CC)cc(nc1Nc2ccccc2)C	0.74	Highly toxic
196	161326-34-7	O=C2N(Nc1ccccc1)C(\SC)=N/[C@]2(c3ccccc3)C	0.74	Highly toxic
197	299-84-3	COP(=S)(OC)Oc1cc(Cl)c(Cl)cc1Cl	0.74	Highly toxic
198	29091-05-2	FC(F)(F)c1cc(c(c([N+]([O-])=O)c1N)N(CC)CC)[N+]([O-])=O	0.753	Highly toxic
199	40596-69-8	CC(=O)CP(=O)(OC)OC	0.76	Highly toxic
200	17606-31-4	O=S(=O)(SCC(N(C)C)CSS(=O)(=O)c1ccccc1)c2ccccc2	0.76	Highly toxic
201	82692-44-2	Clc1ccc(c(Cl)c1C)C(=O)c3c(nn(c3OCC(=O)c2ccc(cc2)C)C)C	0.762	Highly toxic
202	71561-11-0	Clc1ccc(c(Cl)c1)C(=O)c3c(nn(c3OCC(=O)c2ccccc2)C)C	0.79	Highly toxic
203	74738-17-3	Clc1cccc(c1Cl)c2c(C#N)cnc2	0.8	Highly toxic
204	55-38-9	S=P(OC)(OC)Oc1ccc(SC)c(c1)C	0.8	Highly toxic
205	220899-03-6	Brc2ccc(OC)c(C(=O)c1c(cc(OC)c(OC)c1OC)C)c2C	0.82	Highly toxic
206	8001-54-5	c1(C[N+](C)(C)*)ccccc1.[ClH-]	0.823	Highly toxic
207	29091-21-2	FC(F)(F)c1cc(c(c([N+]([O-])=O)c1N)N(CCC)CCC)[N+]([O-])=O	0.829	Highly toxic
208	52888-80-9	O=C(SCc1ccccc1)N(CCC)CCC	0.84	Highly toxic
209	28159-98-0	CC(NC1=NC(NC2CC2)=NC(SC)=N1)(C)C	0.86	Highly toxic
210	107-49-3	O=P(OP(=O)(OCC)OCC)(OCC)OCC	0.867	Highly toxic
211	248593-16-0	c1cccc(CO\N=C(\C(=N\OC)\C(C)=N\OC)C)c1\C(C(=O)NC)=N/OC	0.89	Highly toxic
212	51218-49-6	ClCC(=O)N(c1c(cccc1CC)CC)CCOCCC	0.9	Highly toxic
213	173662-97-0	O=C(NC)C(OC)c1c(cccc1)COc2cc(ccc2C)C	0.94	Highly toxic
214	2303-17-5	CC(C)N(C(C)C)C(=O)SCC(Cl)=C(Cl)Cl	0.95	Highly toxic
215	57837-19-1	O=C(N(c1c(cccc1C)C)C(C(=O)OC)C)COC	0.96	Highly toxic
216	624-92-0	S(SC)C	0.97	Highly toxic
217	116714-46-6	Clc1cc(ccc1OC(F)(F)C(F)OC(F)(F)F)NC(=O)NC(=O)c2c(F)cccc2F	0.97	Highly toxic
218	2686-99-9	O=C(Oc1cc(c(c(c1)C)C)C)NC	0.98	Highly toxic
219	10222-01-2	C(C(N)=O)(C#N)(Br)Br	0.98	Highly toxic
220	55512-33-9	O=C(SCCCCCCCC)Oc2cc(Cl)nnc2c1ccccc1	0.99	Highly toxic
221	119446-68-3	O1C[C@@H](C)O[C@@]1(Cn1ncnc1)c1c(Cl)cc(Oc2ccc(Cl)cc2)cc1	1.1	Moderately toxic
222	874967-67-6	Cn1cc(c(n1)C(F)F)C(=O)Nc2ccccc2C3CC3C4CC4.Cn1cc(c(n1)C(F)F)C(=O)Nc2ccccc2C3CC3C4CC4.Cn1cc(c(n1)C(F)F)C(=O)Nc2ccccc2C3CC3C4CC4.Cn1cc(c(n1)C(F)F)C(=O)Nc2ccccc2C3CC3C4CC4	1.1	Moderately toxic
223	741-58-2	O=S(=O)(NCCSP(=S)(OC(C)C)OC(C)C)c1ccccc1	1.1	Moderately toxic
224	886-50-0	S(c1nc(nc(n1)NC(C)(C)C)NCC)C	1.1	Moderately toxic
225	74-88-4	IC	1.12	Moderately toxic
226	66246-88-6	Clc1ccc(c(Cl)c1)C(CCC)Cn2ncnc2	1.13	Moderately toxic
227	95-06-7	N(C(SCC(=C)Cl)=S)(CC)CC	1.15	Moderately toxic
228	7173-51-5	C([N+](CCCCCCCCCC)(C)C)CCCCCCCCC.[ClH-]	1.16	Moderately toxic
229	2536-31-4	c12[C@@](c3c(cccc3)c1ccc(c2)Cl)(C(OC)=O)O	1.16	Moderately toxic
230	87237-48-7	O=C(OCCOCC)C(Oc2ccc(Oc1ncc(cc1Cl)C(F)(F)F)cc2)C	1.18	Moderately toxic
231	85509-19-9	n1(cncn1)C[Si](c1ccc(F)cc1)(C)c1ccc(cc1)F	1.2	Moderately toxic
232	19666-30-9	CC(C)OC1=C(C=C(C(=C1)N2C(=O)OC(=N2)C(C)(C)C)Cl)Cl	1.2	Moderately toxic
233	106917-52-6	Clc2cc(ccc2NS(=O)(=O)c1ccc(Cl)c(c1)C(F)(F)F)[N+]([O-])=O	1.2	Moderately toxic
234	87392-12-9	ClCC(=O)N(c1c(cccc1CC)C)C(COC)C	1.23	Moderately toxic
235	31717-87-0	O=C(O)C.O2C(CN(C1CCCCCCCCCCC1)CC2C)C	1.23	Moderately toxic
236	122-14-5	S=P(Oc1cc(c(cc1)[N+]([O-])=O)C)(OC)OC	1.3	Moderately toxic
237	93-76-5	c1(c(cc(Cl)c(c1)Cl)Cl)OCC(O)=O	1.3	Moderately toxic
238	87757-18-4	O1N(CCC1)C([C@@H](C)Oc1ccc(cc1)Oc1c(cc(cn1)Cl)Cl)=O	1.3	Moderately toxic
239	126833-17-8	O=C(Nc1ccc(O)c(Cl)c1Cl)C2(C)CCCCC2	1.34	Moderately toxic
240	553-82-2	COc1ccc(Cl)cc1Cl	1.4	Moderately toxic
241	688046-61-9	n1cc(c(c(c1OC)C(=O)c1c(c(c(cc1C)OC)OC)OC)C)Cl	1.44	Moderately toxic
242	35554-44-0	Clc1ccc(c(Cl)c1)C(OC\C=C)Cn2ccnc2	1.48	Moderately toxic
243	114369-43-6	Clc1ccc(cc1)CCC(C#N)(c2ccccc2)Cn3ncnc3	1.5	Moderately toxic
244	67747-09-5	CCCN(CCOC1=C(C=C(C=C1Cl)Cl)Cl)C(=O)N2C=CN=C2	1.5	Moderately toxic
245	92-52-4	c1cc(ccc1)c2ccccc2	1.5	Moderately toxic
246	1420-06-0	C(c1ccccc1)(c1ccccc1)(c1ccccc1)N1CCOCC1	1.5	Moderately toxic
247	56-38-2	S=P(Oc1ccc(cc1)[N+]([O-])=O)(OCC)OCC	1.5	Moderately toxic
248	403640-27-7	Fc1cccc(F)c1COCC3(O\N=C(\c2sccc2C)C3)C	1.53	Moderately toxic
249	83657-18-5	n1(ncnc1)C(\[C@H](O)C(C)(C)C)=C/c1c(cc(cc1)Cl)Cl	1.58	Moderately toxic
250	83657-24-3	Clc2ccc(/C=C(/n1ncnc1)C(O)C(C)(C)C)c(Cl)c2	1.58	Moderately toxic
251	1646-87-3	O=S(C(\C=N\OC(=O)NC)(C)C)C	1.6	Moderately toxic
252	2634-33-5	c12c(cccc2)s[nH]c1=O	1.6	Moderately toxic
253	63935-38-6	ClC4(Cl)C(c1ccc(OCC)cc1)(C(=O)OC(C#N)c3cccc(Oc2ccccc2)c3)C4	1.6	Moderately toxic
254	116255-48-2	BrC1CC(OC1)(c2c(Cl)cc(Cl)cc2)Cn3ncnc3	1.7	Moderately toxic
255	141112-29-0	O=C(c1c(onc1)C2CC2)c3ccc(cc3S(=O)(=O)C)C(F)(F)F	1.7	Moderately toxic
256	13684-63-4	O=C(Oc1cccc(c1)NC(=O)OC)Nc2cc(ccc2)C	1.71	Moderately toxic
257	121451-02-3	c1cc(c(c(c1)F)C(=O)NC(=O)Nc2cc(c(c(c2F)Cl)OC(C(C(F)(F)F)F)(F)F)Cl)F	1.8	Moderately toxic
258	38727-55-8	c1(N(CC(OCC)=O)C(CCl)=O)c(cccc1CC)CC	1.82	Moderately toxic
259	178928-70-6	S=C1/N=C\NN1CC(O)(Cc2ccccc2Cl)C3(Cl)CC3	1.83	Moderately toxic
260	50-00-0	C=O	1.84	Moderately toxic
261	136426-54-5	Clc1ccc(c(Cl)c1)N3C(=N\c2c(cc(F)cc2)C3=O)/n4ncnc4	1.9	Moderately toxic
262	95-76-1	c1(c(ccc(c1)N)Cl)Cl	1.94	Moderately toxic
263	2164-08-1	O=C1\C3=C(/NC(=O)N1C2CCCCC2)CCC3	2	Moderately toxic
264	88671-89-0	Clc1ccc(cc1)C(C#N)(CCCC)Cn2ncnc2	2	Moderately toxic
265	93-71-0	ClCC(=O)N(C\C=C)C\C=C	2	Moderately toxic
266	943831-98-9	COc1c(ccc(c1F)c2cc(c(c(n2)C(=O)OC)Cl)N)Cl	2.01	Moderately toxic
267	125116-23-6	Clc1ccc(cc1)CC2C(O)(C(CC2)(C)C)Cn3ncnc3	2.1	Moderately toxic
268	55179-31-2	O(c2ccc(c1ccccc1)cc2)C(n3ncnc3)C(O)C(C)(C)C	2.14	Moderately toxic
269	106700-29-2	ClCC(=O)N(\C(=C(\C)C)c1ccccc1)CCOCC	2.2	Moderately toxic
270	122-39-4	c1(Nc2ccccc2)ccccc1	2.2	Moderately toxic
271	447399-55-5	c1(CS(C2=NOC(C)(C)C2)(=O)=O)c(C(F)(F)F)nn(c1OC(F)F)C	2.2	Moderately toxic
272	1014-69-3	CNc1nc(NC(C)C)nc(SC)n1	2.2	Moderately toxic
273	875915-78-9	CC(C)Oc1ccc(C(=O)C(C)(C)NC(=O)c2sccc2C)c(C)c1	2.27	Moderately toxic
274	5234-68-4	C1(C(Nc2ccccc2)=O)=C(OCCS1)C	2.3	Moderately toxic
275	103361-09-7	O=C3\C4=C(/C(=O)N3c2c(F)cc1OCC(=O)N(c1c2)CC#C)CCCC4	2.3	Moderately toxic
276	120-23-0	c12c(ccc(c1)OCC(O)=O)cccc2	2.39	Moderately toxic
277	63782-90-1	Fc2ccc(N(C(=O)c1ccccc1)[C@@H](C(=O)OC(C)C)C)cc2Cl	2.4	Moderately toxic
278	121552-61-2	n1c(cc(nc1Nc2ccccc2)C3CC3)C	2.41	Moderately toxic
279	4147-51-7	CCSc1nc(NC(C)C)nc(NC(C)C)n1	2.43	Moderately toxic
280	66753-07-9	c1(nc(=O)[nH]c(n1)NCC)NC(C)(C)C	2.5	Moderately toxic
281	60207-93-4	Clc1ccc(c(Cl)c1)C2(OCC(O2)CC)Cn3ncnc3	2.5	Moderately toxic
282	87674-68-8	Cc1csc(c1N(C(C)COC)C(=O)CCl)C	2.6	Moderately toxic
283	120-83-2	Clc1cc(Cl)c(O)cc1	2.63	Moderately toxic
284	188425-85-6	c1nc(Cl)c(cc1)C(Nc1c(cccc1)c1ccc(cc1)Cl)=O	2.7	Moderately toxic
285	188489-07-8	C(=O)(OCC)COc1c(cc(c(c1)n1ncc(c(c1=O)C)C(F)(F)F)F)Cl	2.7	Moderately toxic
286	298-00-0	S=P(Oc1ccc(cc1)[N+]([O-])=O)(OC)OC	2.7	Moderately toxic
287	495-48-7	c1(\[N+](=N\c2ccccc2)[O-])ccccc1	2.7	Moderately toxic
288	542-75-6	Cl[C@H]=CCCl	2.78	Moderately toxic
289	82-66-6	O=C2c1ccccc1C(=O)C2C(=O)C(c3ccccc3)c4ccccc4	2.8	Moderately toxic
290	64249-01-0	Clc1ccc(N(C(=O)CSP(=S)(OC)OC)C(C)C)cc1	2.8	Moderately toxic
291	91315-15-0	C1[C@@H](C)O[C@@H](CN1CCCCCCCCCCCC)C	2.83	Moderately toxic
292	50471-44-8	O=C2OC(C(=O)N2c1cc(Cl)cc(Cl)c1)(\C=C)C	2.84	Moderately toxic
293	1344-81-6	[Ca+2].S	2.86	Moderately toxic
294	374726-62-2	Clc1ccc(cc1)C(OCC#C)C(=O)NCCc1ccc(c(c1)OC)OCC#C	2.9	Moderately toxic
295	3547-33-9	CCCCCCCCSCCO	2.9	Moderately toxic
296	112-12-9	C(CCCCCC)CCC(C)=O	3	Moderately toxic
297	98-01-1	O=Cc1ccco1	3.06	Moderately toxic
298	333-41-5	S=P(OCC)(OCC)Oc1nc(nc(c1)C)C(C)C	3.1	Moderately toxic
299	39885-50-2	Clc1cc(ccc1N)C(F)(F)F	3.1	Moderately toxic
300	23135-22-0	O=C(C(=N\OC(=O)NC)\SC)N(C)C	3.13	Moderately toxic
301	330-55-2	Clc1ccc(NC(=O)N(OC)C)cc1Cl	3.15	Moderately toxic
302	2675-77-6	Clc1cc(OC)c(Cl)cc1OC	3.3	Moderately toxic
303	110488-70-5	O=C(\C=C(\c1ccc(Cl)cc1)c2ccc(OC)c(OC)c2)N3CCOCC3	3.4	Moderately toxic
304	117718-60-2	FC(F)c2nc(c(C/1=N/CCS\1)c(c2C(=O)OC)CC(C)C)C(F)(F)F	3.4	Moderately toxic
305	158237-07-1	Clc1ccccc1N2/N=N\N(C2=O)C(=O)N(C3CCCCC3)CC	3.4	Moderately toxic
306	3383-96-8	S=P(OC)(OC)Oc2ccc(Sc1ccc(OP(=S)(OC)OC)cc1)cc2	3.49	Moderately toxic
307	94-82-6	Clc1cc(Cl)ccc1OCCCC(=O)O	3.5	Moderately toxic
308	27134-27-6	Clc1ccc(Cl)c(N)c1	3.5	Moderately toxic
309	640-15-3	S=P(OC)(SCCSCC)OC	3.7	Moderately toxic
310	50563-36-5	ClCC(=O)N(c1c(cccc1C)C)CCOC	3.9	Moderately toxic
311	74-83-9	BrC	3.9	Moderately toxic
312	51218-45-2	CCC1=CC=CC(=C1N(C(C)COC)C(=O)CCl)C	3.9	Moderately toxic
313	9016-45-9	c1(ccc(OCCOCCO)cc1)CCCCCCCCC	4	Moderately toxic
314	43121-43-3	CC(C)(C)C(=O)C(N1C=NC=N1)OC2=CC=C(C=C2)Cl	4.08	Moderately toxic
315	60168-88-9	Clc1ccc(cc1)C(O)(c2ccccc2Cl)c3cncnc3	4.1	Moderately toxic
316	36335-67-8	c1(c(ccc(c1)C)[N+](=O)[O-])O[P@@](N[C@@H](CC)C)(OCC)=S	4.1	Moderately toxic
317	29457-72-5	[Li+].FC(F)(C(F)(F)S([O-])(=O)=O)C(F)(F)C(F)(F)C(F)(F)C(F)(F)C(F)(F)C(F)(F)F	4.2	Moderately toxic
318	2008-41-5	O=C(SCC)N(CC(C)C)CC(C)C	4.2	Moderately toxic
319	22259-30-9	O=C(Oc1cccc(\N=C\N(C)C)c1)NC	4.3	Moderately toxic
320	94-81-5	Clc1cc(c(OCCCC(=O)O)cc1)C	4.3	Moderately toxic
321	107534-96-3	Clc1ccc(cc1)CCC(O)(C(C)(C)C)Cn2ncnc2	4.4	Moderately toxic
322	1912-24-9	Clc1nc(nc(n1)NC(C)C)NCC	4.5	Moderately toxic
323	1134-23-2	O=C(SCC)N(CC)C1CCCCC1	4.5	Moderately toxic
324	99257-43-9	N(CCCCCCCCNC(=N)N)CCCCCCCCNC(=N)N.c1(c(cccc1)CCCCCCCCCCCC)S(=O)(=O)O.c1(c(cccc1)CCCCCCCCCCCC)S(=O)(=O)O.c1(c(cccc1)CCCCCCCCCCCC)S(=O)(=O)O	4.5	Moderately toxic
325	1929-77-7	O=C(SCCC)N(CCC)CCC	4.6	Moderately toxic
326	1861-32-1	Clc1c(C(=O)OC)c(Cl)c(Cl)c(C(=O)OC)c1Cl	4.7	Moderately toxic
327	23950-58-5	Clc1cc(C(=O)NC(C#C)(C)C)cc(Cl)c1	4.7	Moderately toxic
328	98243-83-5	O=C(N(c1c(cccc1C)C)[C@@H](C(=O)OC)C)Cc2ccccc2	4.9	Moderately toxic
329	13360-45-7	CN(C(=O)NC1=CC(=C(C=C1)Br)Cl)OC	5	Moderately toxic
330	834-12-8	S(c1nc(nc(n1)NC(C)C)NCC)C	5	Moderately toxic
331	22936-75-0	S(c1nc(nc(n1)NC(C)C(C)C)NCC)C	5	Moderately toxic
332	473798-59-3	n1(c(c(c(=O)n1C(C)C)c1ccccc1C)N)C(=O)SCC=C	5.2	Moderately toxic
333	709-98-8	Clc1ccc(NC(=O)CC)cc1Cl	5.4	Moderately toxic
334	7287-19-6	S(c1nc(nc(n1)NC(C)C)NC(C)C)C	5.5	Moderately toxic
335	78370-21-5	N#CCON=C(C#N)c1ccccc1	5.6	Moderately toxic
336	33813-20-6	N12C(SSC1=S)=NCC2	5.7	Moderately toxic
337	13171-21-6	O=P(O/C(=C(\Cl)C(=O)N(CC)CC)C)(OC)OC	6	Moderately toxic
338	24151-93-7	O=C(N1C(C)CCCC1)CSP(=S)(OCCC)OCCC	6	Moderately toxic
339	83733-82-8	CCCC(=O)N(CSP(=S)(OC)OC)c1ccccc1Cl	6	Moderately toxic
340	121776-33-8	C(=O)(C(Cl)Cl)N1C(O[C@@H](C1)c1occc1)(C)C	6.2	Moderately toxic
341	141-66-2	O=P(O/C(=C/C(=O)N(C)C)C)(OC)OC	6.3	Moderately toxic
342	16725-53-4	C(CCCC\C=C/CCCC)CCCOC(C)=O	6.35	Moderately toxic
343	33189-72-9	O=C(OCCCCCCCCCC\C=C\CC)C	6.35	Moderately toxic
344	20711-10-8	C(\CC)=C/CCCCCCCCCCOC(=O)C	6.35	Moderately toxic
345	15310-01-7	O=C(Nc1ccccc1)c2ccccc2I	6.4	Moderately toxic
346	1929-82-4	ClC(Cl)(Cl)c1nc(Cl)ccc1	6.5	Moderately toxic
347	98-55-5	C([C@@H]1CCC(C)=CC1)(C)(C)O	6.6	Moderately toxic
348	2635-10-1	O=C(Oc1cc(c(c(c1)C)S(=O)C)C)NC	6.6	Moderately toxic
349	15299-99-7	O=C(N(CC)CC)C(Oc2cccc1ccccc12)C	6.6	Moderately toxic
350	274671-61-3	c1c(ccc(COCC[NH+](CC)CC)c1)C.[ClH-]	6.7	Moderately toxic
351	50512-35-1	O=C(OC(C)C)C(\C(=O)OC(C)C)=C1/SCCS1	6.8	Moderately toxic
352	138164-12-2	CCCC(=O)c1c(C)c(c(C)cc1C)C2CC(\O)=C(/C(=O)C2)\C(\CC)=N\OCC	6.9	Moderately toxic
353	1014-70-6	S(c1nc(nc(n1)NCC)NCC)C	7	Moderately toxic
354	1836-75-5	c1(Oc2ccc([N+](=O)[O-])cc2)c(cc(Cl)cc1)Cl	7	Moderately toxic
355	6923-22-4	O=P(O/C(=C/C(=O)NC)C)(OC)OC	7	Moderately toxic
356	50-29-3	Clc1ccc(cc1)C(c2ccc(Cl)cc2)C(Cl)(Cl)Cl	7	Moderately toxic
357	1194-65-6	N#Cc1c(Cl)cccc1Cl	7.2	Moderately toxic
358	32809-16-8	Clc1cc(cc(Cl)c1)N2C(=O)C3(CC3(C2=O)C)C	7.22	Moderately toxic
359	41814-78-2	n2nc3sc1cccc(c1n3c2)C	7.3	Moderately toxic
360	119-12-0	S=P(OCC)(OCC)O/C2=N/N(c1ccccc1)C(=O)/C=C2	7.5	Moderately toxic
361	136849-15-5	O=C(Nc1nc(OC)cc(OC)n1)NS(=O)(=O)Nc3ccccc3C(=O)C2CC2	7.7	Moderately toxic
362	28772-56-7	C1=CC=C(C=C1)C(CC(C2=CC=C(C=C2)C3=CC=C(C=C3)Br)O)C4=C(OC5=CC=CC=C5C4=O)O	8	Moderately toxic
363	4151-50-2	FC(F)(C(F)(F)C(F)(F)C(F)(F)C(F)(F)C(F)(F)C(F)(F)C(F)(F)F)S(=O)(=O)NCC	8	Moderately toxic
364	841-06-5	c1(nc(nc(n1)SC)NCCCOC)NC(C)C	8	Moderately toxic
365	27314-13-2	FC(F)(F)c1cc(ccc1)N2/N=C\C(=C(\Cl)C2=O)NC	8.1	Moderately toxic
366	11812-58-9	O=C(O)C1=CC=C(CO/N=C/C2=C(OC3=CC=CC=C3)N(C)N=C2C)C=C1	8.2	Moderately toxic
367	90982-32-4	O=C(Nc1nc(OC)cc(Cl)n1)NS(=O)(=O)c2ccccc2C(=O)OCC	8.4	Moderately toxic
368	1689-83-4	Ic1cc(C#N)cc(I)c1O	8.5	Moderately toxic
369	112226-61-6	CC(C)(C)N(C(=O)C1=CC=CC=C1)NC(=O)C2=CC=C(C=C2)Cl	8.6	Moderately toxic
370	1918-02-1	Clc1c(N)c(Cl)c(nc1Cl)C(=O)O	8.8	Moderately toxic
371	1113-02-6	O=C(NC)CSP(=O)(OC)OC	9.1	Moderately toxic
372	105-67-9	c1(c(ccc(c1)C)O)C	9.2	Moderately toxic
373	413615-35-7	c1cc(cc2sc(nc12)[C@H](NC(=O)[C@H](NC(O)=O)C(C)C)C)F	9.3	Moderately toxic
374	87130-20-9	O=C(OC(C)C)Nc1cc(OCC)c(OCC)cc1	9.3	Moderately toxic
375	381-73-7	FC(F)C(=O)O	10	Slightly toxic
376	177406-68-7	c1cc(cc2c1nc([C@@H](C)NC(=O)[C@@H](C(C)C)NC(=O)OC(C)C)s2)F	10	Slightly toxic
377	55814-41-0	O=C(c1ccccc1C)Nc2cccc(OC(C)C)c2	10	Slightly toxic
378	150824-47-8	C(\[N+]([O-])=O)=C(\N(Cc1cnc(cc1)Cl)CC)NC	10	Slightly toxic
379	243973-20-8	O=C(O/C1=C(/C(=O)N2N1CCOCC2)c3c(cc(cc3CC)C)CC)C(C)(C)C	10.3	Slightly toxic
380	53112-28-0	n1c(cc(nc1Nc2ccccc2)C)C	10.56	Slightly toxic
381	113136-77-9	O=C(O)C1(CC1)C(=O)Nc2ccc(Cl)cc2Cl	11	Slightly toxic
382	23564-05-8	S=C(Nc1ccccc1NC(=S)NC(=O)OC)NC(=O)OC	11	Slightly toxic
383	23564-06-9	c1(NC(NC(OCC)=O)=S)ccccc1NC(NC(OCC)=O)=S	11	Slightly toxic
384	2227-13-6	Clc2cc(Sc1ccc(Cl)cc1)c(Cl)cc2Cl	11	Slightly toxic
385	59756-60-4	FC(F)(F)c3cc(C=1C(=O)\C(=C/N(C=1)C)c2ccccc2)ccc3	11.7	Slightly toxic
386	6164-98-3	Clc1cc(c(/N=C/N(C)C)cc1)C	11.7	Slightly toxic
387	85-40-5	O=C1NC(=O)C2C1C/C=C\C2	12	Slightly toxic
388	1610-18-0	CC(C)NC1=NC(=NC(=N1)OC)NC(C)C	12	Slightly toxic
389	68505-69-1	O=S(=O)(Oc2cc1c(OCC1(C)C)cc2)CC	12.3	Slightly toxic
390	74222-97-2	O=C(Nc1nc(cc(n1)C)C)NS(=O)(=O)c2ccccc2C(=O)OC	12.5	Slightly toxic
391	736994-63-1	O=C(NC)c1cc(C#N)cc(c1NC(=O)c3cc(Br)nn3c2ncccc2Cl)C	12.6	Slightly toxic
392	56717-11-4	[N+]1(CCCCC1)(CC=C)CC[C@@H](CCCC(C)C)C.[BrH-]	12.7	Slightly toxic
393	12527-76-3	[Cu+2].[O-]S([O-])(=O)=O	13.2	Slightly toxic
394	315-18-4	O=C(Oc1cc(c(c(c1)C)N(C)C)C)NC	13.9	Slightly toxic
395	33693-04-8	O(c1nc(nc(n1)NC(C)(C)C)NCC)C	14	Slightly toxic
396	93-72-1	CC(C(O)=O)OC1=C(Cl)C=C(Cl)C(Cl)=C1	14.8	Slightly toxic
397	139001-49-3	Clc3ccc(OC(C)CON\C(=C2\C(=O)CC(C1CCCSC1)CC2=O)CCC)cc3	15	Slightly toxic
398	1910-42-5	c1(c2cc[n+](C)cc2)cc[n+](C)cc1.[ClH-].[ClH-]	15	Slightly toxic
399	81777-89-1	Clc1ccccc1CN2OCC(C2=O)(C)C	15.5	Slightly toxic
400	77-73-6	C\2=C\C3C1/C=C\C(C1)C3C/2	15.9	Slightly toxic
401	2212-67-1	O=C(SCC)N1CCCCCC1	16	Slightly toxic
402	10045-86-0	P(=O)([O-])([O-])[O-].[Fe+3]	17	Slightly toxic
403	301-12-2	O=S(CCSP(=O)(OC)OC)CC	17	Slightly toxic
404	62476-59-9	[Na+].Clc2cc(ccc2Oc1cc(C([O-])=O)c([N+]([O-])=O)cc1)C(F)(F)F	17	Slightly toxic
405	139-40-2	Clc1nc(nc(n1)NC(C)C)NC(C)C	17.5	Slightly toxic
406	108189-58-8	C/C=C(\C)/C(=O)O[C@H]1C[C@H]([C@]2(CO[C@@H]3[C@@H]2[C@]14CO[C@@]([C@H]4[C@]([C@@H]3O)(C)[C@@]56[C@@H]7C[C@H]([C@@]5(O6)C)[C@]8(CCO[C@@H]8O7)O)(C(=O)OC)O)C(=O)OC)OC(=O)C	17.65	Slightly toxic
407	91-53-2	O(c2ccc1c(\C(=C/C(N1)(C)C)C)c2)CC	18	Slightly toxic
408	111-92-2	N(CCCC)CCCC	18	Slightly toxic
409	26259-45-0	O(c1nc(nc(n1)NC(C)CC)NCC)C	18	Slightly toxic
410	1327-53-3	o1[as]2o[as]3o[as]1o[as](o2)o3	18.1	Slightly toxic
411	56425-91-3	CC(C)C(C1=CC=C(C=C1)OC(F)(F)F)(C2=CN=CN=C2)O	18.3	Slightly toxic
412	19937-59-8	Clc1cc(ccc1OC)NC(=O)N(C)C	18.9	Slightly toxic
413	4685-14-7	c2cc(c1cc[n+](cc1)C)cc[n+]2C	19	Slightly toxic
414	584-79-2	O=C2\C(=C(\C)C(OC(=O)C1C(/C=C(/C)C)C1(C)C)C2)C\C=C	19	Slightly toxic
415	51707-55-2	O=C(Nc1ccccc1)Nc2snnc2	19	Slightly toxic
416	5259-88-1	O=S1(=O)C(=C(/OCC1)C)\C(=O)Nc2ccccc2	19.9	Slightly toxic
417	15545-48-9	Clc1cc(NC(=O)N(C)C)ccc1C	20	Slightly toxic
418	40020-01-7	O=C\1C(=N/NC(/Cl)=C/1)\c2ccccc2	20	Slightly toxic
419	2275-18-5	O=C(NC(C)C)CSP(=S)(OCC)OCC	20	Slightly toxic
420	6485-40-1	[H][C@]1(CC=C(C)C(=O)C1)C(C)=C	20.3	Slightly toxic
421	2764-72-9	c12c3[n+](CC[n+]1cccc2)cccc3	21	Slightly toxic
422	101-10-0	c1(O[C@@H](C(O)=O)C)cc(ccc1)Cl	21	Slightly toxic
423	14433-76-2	C(C(N(C)C)=O)CCCCCCCC	21.1	Slightly toxic
424	136191-64-5	c1c(OC)nc(Oc2c(c(ccc2)\C(C)=N\OC)C(=O)OC)nc1OC	21.2	Slightly toxic
425	46503-52-0	O=C(c1ccc(Cl)cc1Cl)Cn2ccnc2	21.3	Slightly toxic
426	104040-78-0	O=C(Nc1nc(OC)cc(OC)n1)NS(=O)(=O)c2ncccc2C(F)(F)F	22	Slightly toxic
427	4726-14-1	[O-][N+](=O)c1cc(cc([N+]([O-])=O)c1N(CCC)CCC)S(=O)(=O)C	22	Slightly toxic
428	140923-17-7	CC(C)OC(=O)NC(C(=O)N[C@@H](C)c1ccc(C)cc1)C(C)C	22.7	Slightly toxic
429	75736-33-3	Clc1ccc(c(Cl)c1)CC(n2ncnc2)C(O)C(C)(C)C	23.9	Slightly toxic
430	111988-49-9	Clc1ncc(cc1)CN2C(=N\C#N)\SCC2	24.5	Slightly toxic
431	17757-70-9	O=S2C(/C(=O)Nc1ccccc1)=C(\OCC2)C	25	Slightly toxic
432	824-78-2	[Na+].O=[N+]([O-])c1ccc([O-])cc1	25	Slightly toxic
433	99129-21-2	O=C1/C(C(=O)CC(CC(SCC)C)C1)=C(\NOCC=CCl)CC	25	Slightly toxic
434	35597-44-5	O=P(O)(CC[C@@H](C(=O)O)N)C	27	Slightly toxic
435	34681-10-2	O=C(O\N=C(/C(SC)C)C)NC	29	Slightly toxic
436	58810-48-3	O=C2OCCC2N(C(=O)CCl)c1c(cccc1C)C	29	Slightly toxic
437	139528-85-1	Clc1c(ccc(Cl)c1NS(=O)(=O)c2nc3nc(OC)cc(OC)n3n2)C	29.3	Slightly toxic
438	2164-17-2	O=C(Nc1cc(ccc1)C(F)(F)F)N(C)C	30	Slightly toxic
439	131929-63-0	CCC1CCCC(C(C(=O)C2=CC3C4CC(CC4C=CC3C2CC(=O)O1)OC5C(C(C(C(O5)C)OC)OC)OC)C)OC6CCC(C(O6)C)NC	30	Slightly toxic
440	168316-95-8	CCC1CCCC(OC2CCC(C(C)O2)N(C)C)C(C)C(=O)C3CC4C(CCC5CC(CC45)OC6CC(C)C(OC)C(OC)C6OC)C3CC(=O)O1	30	Slightly toxic
441	34123-57-4	N(C(=O)Nc1ccc(cc1)C(C)C)C	32	Slightly toxic
442	1563-38-8	c12c(CC(O1)(C)C)cccc2O	32.3	Slightly toxic
443	57646-30-7	O=C(N(c1c(cccc1C)C)C(C(=O)OC)C)c2occc2	32.5	Slightly toxic
444	57764-08-6	CC1=C(C(=CC=C1)C)N(C(C)C(=O)OC)C(=O)C2=CC=C(C=C2)C(=O)C3=CC=CC=C3	32.5	Slightly toxic
445	43096-46-4	C1CCC(CC1)C(=O)NC2=CC=CC(=C2)N	34.4	Slightly toxic
446	66840-71-9	O=S(=O)(Nc1ccc(cc1)C)N(C)C	35	Slightly toxic
447	95266-40-3	O=C1C(/C(=O)CC(C(=O)OCC)C1)=C(/O)C2CC2	35	Slightly toxic
448	1646-88-4	O=S(=O)(C(\C=N\OC(=O)NC)(C)C)C	35.3	Slightly toxic
449	67233-85-6	[Na+].[O-]c1cc(ccc1OC)[N+]([O-])=O	37.4	Slightly toxic
450	1071-83-6	C(C(=O)[O-])NCP(=O)(O)O	38	Slightly toxic
451	85-41-6	O=C2c1ccccc1C(=O)N2	38	Slightly toxic
452	7783-20-2	O=S(=O)(O)O.N.N	38.2	Slightly toxic
453	94133-62-7	Nc1c(Cl)c(F)nc(O)c1Cl	39	Slightly toxic
454	101-77-9	c1(Cc2ccc(N)cc2)ccc(N)cc1	39	Slightly toxic
455	1303-96-4	O=BO[B](O[B](OB=O)O[Na])O[Na]	40	Slightly toxic
456	1698-60-8	C1=CC=C(C=C1)N2C(=O)C(=C(C=N2)N)Cl	41.3	Slightly toxic
457	1746-81-2	Clc1ccc(NC(=O)N(OC)C)cc1	42	Slightly toxic
458	3060-89-7	Brc1ccc(NC(=O)N(OC)C)cc1	43	Slightly toxic
459	1332-40-7	[Cu+2].[Cu+2].[Cl-].[OH-].[OH-].[OH-]	43.8	Slightly toxic
460	86-86-2	c12c(cccc1CC(N)=O)cccc2	44	Slightly toxic
461	7720-78-7	S(=O)(=O)([O-])[O-].[Fe+2]	45.1	Slightly toxic
462	24691-76-7	CC1=C(CCCO1)C(=O)Nc2ccccc2	45.5	Slightly toxic
463	5902-51-2	O=C1N/C(=C(/Cl)C(=O)N1C(C)(C)C)C	46.2	Slightly toxic
464	5836-29-3	O=C\1c4c(OC(/O)=C/1C3c2ccccc2CCC3)cccc4	48	Slightly toxic
465	94-74-6	Clc1cc(c(OCC(=O)O)cc1)C	50	Slightly toxic
466	10043-35-3	B(O)(O)O	50	Slightly toxic
467	124426-49-9	C(c1c(cccc1Cl)Cl)(=O)NCc1ccc(cc1)C(F)(F)F	50	Slightly toxic
468	55290-64-7	O=S1(=O)/C(=C(/C)S(=O)(=O)CC1)C	52.8	Slightly toxic
469	137-41-7	C(=S)(NC)[S-].[K+]	54	Slightly toxic
470	50594-66-6	Clc2cc(ccc2Oc1cc(C(=O)O)c([N+]([O-])=O)cc1)C(F)(F)F	54	Slightly toxic
471	86-87-3	OC(=O)Cc1cccc2ccccc12	56	Slightly toxic
472	74-89-5	CN	56	Slightly toxic
473	40020-02-8	Clc1cc(OC)c(nn1)c2ccccc2	60	Slightly toxic
474	23947-60-6	O=C/1/N=C(\N\C(=C\1CCCC)C)NCC	60.8	Slightly toxic
475	13708-85-5	P([O-])([O-])=O.[Na+].[Na+]	61.26	Slightly toxic
476	81-81-2	O=C\1c3c(OC(/O)=C/1C(c2ccccc2)CC(=O)C)cccc3	65	Slightly toxic
477	111991-09-4	O=C(Nc1nc(OC)cc(OC)n1)NS(=O)(=O)c2ncccc2C(=O)N(C)C	65.7	Slightly toxic
478	83055-99-6	O=C(Nc1nc(OC)cc(OC)n1)NS(=O)(=O)Cc2ccccc2C(=O)OC	66	Slightly toxic
479	85-00-7	[Br-].[Br-].c2cccc3c1[n+](cccc1)CC[n+]23	67	Slightly toxic
480	79-09-4	CCC(=O)O	67.1	Slightly toxic
481	385-00-2	O=C(O)c1c(F)cccc1F	69	Slightly toxic
482	625-40-1	C(=C/Cl)\C(=O)O	69.5	Slightly toxic
483	134-62-3	O=C(c1cc(ccc1)C)N(CC)CC	71.3	Slightly toxic
484	105726-67-8	CCCC(CC)(C(=O)NC)CCC	72	Slightly toxic
485	84-65-1	O=C2c1ccccc1C(=O)c3ccccc23	72	Slightly toxic
486	95617-09-7	CC(C(=O)O)Oc1ccc(cc1)Oc2nc3ccc(cc3o2)Cl	72.2	Slightly toxic
487	113158-40-0	O=C(O)C(Oc3ccc(Oc1nc2ccc(Cl)cc2o1)cc3)C	72.2	Slightly toxic
488	21087-64-9	O=C1/C(=N\N=C(\SC)N1N)C(C)(C)C	74.6	Slightly toxic
489	591-27-5	Oc1cccc(N)c1	75	Slightly toxic
490	99607-70-2	O=C(OC(C)CCCCC)COc1ccc(Cl)c2cccnc12	76	Slightly toxic
491	49866-87-7	c1(c2ccccc2)cc([n+](n1C)C)c1ccccc1	76	Slightly toxic
492	132-66-1	O=C(O)c1ccccc1C(=O)Nc3cccc2ccccc23	76.1	Slightly toxic
493	145-73-3	O=C(O)C1C(C(=O)O)C2OC1CC2	78	Slightly toxic
494	1190-29-0	O=C(O)C(SP(=S)(OC)OC)CC(=O)OCC	79	Slightly toxic
495	135186-78-6	COc(c3)nc(nc(OC)3)Sc(c2)c(C(=O)1)c(cc2)C(C)O1	81	Slightly toxic
496	37107-08-7	O=[PH2+](O)OCN(CO[PH2+](=O)O)CCN(CCN(CO[PH2+](=O)O)CO[PH2+](=O)O)CO[PH2+](=O)O	82	Slightly toxic
497	147150-35-4	O=C(OC)c1cccc(Cl)c1NS(=O)(=O)c2nc3cc(F)nc(OCC)n3n2	86	Slightly toxic
498	90717-03-6	O=C(O)c1c(Cl)ccc2cc(cnc12)C	86.8	Slightly toxic
499	422556-08-9	c1(S(Nc2nc3n(c(cc(OC)n3)OC)n2)(=O)=O)c(C(F)(F)F)ccnc1OC	87	Slightly toxic
500	7664-38-2	P(O)(O)(O)=O	87	Slightly toxic
501	94-74-6	Cc1cc(Cl)ccc1OCC(=O)O	89	Slightly toxic
502	141776-32-1	COc1nc(nc(OC)c1)NC(=O)NS(=O)(=O)c2c(nc3ccccn23)S(=O)(=O)CC	91	Slightly toxic
503	491-36-1	O=C2\N=C/Nc1ccccc12	91	Slightly toxic
504	500-72-1	c1ccc(cc1)NC(=O)C(=O)O	93	Slightly toxic
505	125401-92-5	[Na+].COc1nc(nc(OC)c1)Oc3cccc(Oc2nc(cc(OC)n2)OC)c3C([O-])=O	95	Slightly toxic
506	181274-17-9	[Na+].O=S(=O)(/N=C(\[O-])N1/N=C(/OC)N(C1=O)C)c2ccccc2OC(F)(F)F	96.7	Slightly toxic
507	36315-01-2	O(c1nc(nc(OC)c1)N)C	97	Slightly toxic
508	36315-01-2	COc1cc(OC)nc(N)n1	97	Slightly toxic
509	140163-89-9	N1(C(\N(CC1)CC)=N/C#N)[P@@](SCCC)(OCC)=O	97.4	Slightly toxic
510	2198-53-0	O=C(Nc1c(C)cccc1C)COC	98.9	Slightly toxic
511	25606-41-1	[Cl-].O=C(OCCC)NCCC[NH+](C)C	99	Slightly toxic
512	57754-85-5	C(CN)O.c1(c(ccc(n1)Cl)Cl)C(=O)O	99.9	Slightly toxic
513	81334-34-1	O=C(O)c1c(ncc(c1)COC)/C2=N/C(C(=O)N2)(C(C)C)C	99.9	Slightly toxic
514	14808-60-7	[Si](=O)=O	100	Nontoxic
515	2136-79-0	C1(=C(C(=C(C(=C1Cl)Cl)C(=O)O)Cl)Cl)C(=O)O	100	Nontoxic
516	15302-91-7	C1CCCC[N+]1(C)C	100	Nontoxic
517	400852-66-6	COc1cc(nc(n1)NC(=O)NS(=O)(=O)c2cc(ccc2C(=O)O)CNS(=O)(=O)C)OC	100	Nontoxic
518	150114-71-9	Clc1c(nc(Cl)cc1N)C(=O)O	100	Nontoxic
519	25057-89-0	O=C1N(C(C)C)S(=O)(=O)Nc2ccccc12	100	Nontoxic
520	471-34-1	[Ca+2].[O-]C([O-])=O	100	Nontoxic
521	16118-49-3	c1(NC(O[C@@H](C(NCC)=O)C)=O)ccccc1	100	Nontoxic
522	66215-27-8	n1c(nc(nc1N)NC2CC2)N	100	Nontoxic
523	1918-00-9	Clc1ccc(Cl)c(c1OC)C(=O)O	100	Nontoxic
524	158062-67-0	O=C(NCC#N)c1cnccc1C(F)(F)F	100	Nontoxic
525	145701-23-1	Fc1cccc(F)c1NS(=O)(=O)c2nc3c(F)cnc(OC)n3n2	100	Nontoxic
526	10004-44-1	Cc1cc(=O)[nH]o1	100	Nontoxic
527	81335-37-7	O=C(O)c2c(nc1ccccc1c2)/C3=N/C(C(=O)N3)(C(C)C)C	100	Nontoxic
528	16484-77-8	Clc1cc(c(O[C@@H](C(=O)O)C)cc1)C	100	Nontoxic
529	24307-26-4	[Cl-].C[N+]1(C)CCCCC1	100	Nontoxic
530	70630-17-0	O=C(N(c1c(cccc1C)C)[C@@H](C(=O)OC)C)COC	100	Nontoxic
531	219714-96-2	FC(F)(F)c1cccc(OCC(F)F)c1S(=O)(=O)Nc2nc3c(cnc(OC)n3n2)OC	100	Nontoxic
532	127277-53-6	[Ca+2].O=C1C(=C(\[O-])CC)/C(=O)CC(C(=O)O)C1.[O-]\C(=C1\C(=O)CC(C(=O)O)CC1=O)CC	100	Nontoxic
533	94125-34-5	FC(F)(F)CCc1ccccc1S(=O)(=O)NC(=O)Nc2nc(nc(OC)n2)C	100	Nontoxic
534	82097-50-5	CC1=NC(=NC(=N1)OC)NC(=O)NS(=O)(=O)C2=CC=CC=C2OCCCl	100	Nontoxic
535	142469-14-5	FC(F)(F)c1ccccc1S(=O)(=O)NC(=O)Nc2nc(nc(OC)n2)C(F)(F)F	100	Nontoxic
536	210631-68-8	Oc1n(C)ncc1C(=O)c2ccc(c(c2C)C=3CCON=3)S(C)(=O)=O	100	Nontoxic
537	53774-07-5	Clc2cc(Cl)ccc2Oc1cc(C(=O)O)c([N+]([O-])=O)cc1	100	Nontoxic
538	2814-20-2	O=C/1/N=C(\N\C(=C\1)C)C(C)C	100	Nontoxic
539	3401-80-7	Clc1ccc(Cl)c(C(=O)O)c1O	100	Nontoxic
540	4710-17-2	O=S(=O)(Nc1ccccc1)N(C)C	100	Nontoxic
541	40843-25-2	Clc2cc(Cl)ccc2Oc1ccc(OC(C(=O)O)C)cc1	100	Nontoxic
542	158063-66-2	O=C(O)c1cnccc1C(F)(F)F	100	Nontoxic
543	22633-44-9	Clc1cc(cnc1C(=O)O)C(F)(F)F	100	Nontoxic
544	88-99-3	O=C(O)c1ccccc1C(=O)O	100	Nontoxic
545	88-97-1	O=C(O)c1ccccc1C(=O)N	100	Nontoxic
546	1852-17-1	O=C1NCCCN1	100	Nontoxic
547	767-15-7	n1c(cc(nc1N)C)C	100	Nontoxic
548	104273-73-6	C1(\C(C(CC(C1)C(=O)O)=O)=C(\O)C1CC1)=O	100	Nontoxic
549	76578-12-6	O=C(O)[C@H](Oc3ccc(Oc1nc2ccc(Cl)cc2nc1)cc3)C	100	Nontoxic
550	17254-80-7	Cl\C1=C(\C=N/N(C1=O)C)N	100	Nontoxic
551	335104-84-2	CS(c1c(COCC(F)(F)F)c(Cl)c(C(C2C(=O)CCCC2=O)=O)cc1)(=O)=O	100	Nontoxic
552	283159-90-0	Clc1ccc(cc1)C(NC(=O)[C@@H](NC(=O)OC(C)C)C(C)C)CC(=O)OC	100	Nontoxic
553	468-44-0	C1C[C@H]2[C@]34CC[C@@H]([C@@](C)([C@H]3[C@@H]([C@@]32CC([C@@H]1C3)=C)C(=O)O)C(O4)=O)O	100	Nontoxic
554	467430-42-8	C[C@@H](N(C(=O)COC)c1c(C)cccc1C)C(=O)O	100	Nontoxic
555	104390-56-9	C[C@@H](N(C(=O)COC)c1c(C)cccc1C(=O)O)C(=O)O	100	Nontoxic
556	129768-28-1	C1=C(NN=C1C(=O)O)C(F)(F)F	100	Nontoxic
557	137640-84-7	FC(F)(F)c1cc(ccc1)Oc2cccc(n2)C(=O)O	100	Nontoxic
558	12771-68-5	OC(c1cncnc1)(c2ccc(OC)cc2)C3CC3	100	Nontoxic
559	1982-47-4	N(C)C(=O)Nc1ccc(Oc2ccc(Cl)cc2)cc1	100	Nontoxic
560	165252-70-0	[O-][N+](=O)NC(=N/C)\NCC1CCOC1	100	Nontoxic
561	2163-80-6	[Na+].[O-][As](=O)(O)C	100	Nontoxic
562	100728-84-5	C(c1c(cc(cc1)C)C1=N[C@@](C(N1)=O)(C(C)C)C)(=O)O	100	Nontoxic
563	57960-19-7	C(CCCCCCCCCCC)C1=C(C(c2c(cccc2)C1=O)=O)OC(=O)C	100	Nontoxic
564	94593-91-6	O=S(=O)(c1ccccc1OCCOC)NC(=O)Nc2nc(OC)nc(OC)n2	100	Nontoxic
565	113036-88-7	Fc1cccc(F)c1C(=O)NC(=O)Nc2ccc(cc2)CO\N=C(/C3CC3)c4ccc(Cl)cc4	100	Nontoxic
566	81405-85-8	COC(=O)c1cc(C)ccc1C=2NC(=O)C(C)(N=2)C(C)C.COC(=O)c1ccc(C)cc1C=2NC(=O)C(C)(N=2)C(C)C	100	Nontoxic
567	53780-34-0	O=S(=O)(Nc1cc(c(cc1C)C)NC(=O)C)C(F)(F)F	100	Nontoxic
568	173980-17-1	C(S(Nc1cc(c(cc1C(=S)N)F)n1nc(n(c1=O)C)C(F)(F)F)(=O)=O)C	100	Nontoxic
569	37894-46-5	COCCO[Si](CCCl)(OCCOC)OCCOC	100	Nontoxic
570	65691-00-1	Clc1ccc(cc1)c2cc(c(s2)c3ccccc3)c4ccccc4	100	Nontoxic
571	104098-48-8	O=C(O)c1c(ncc(c1)C)/C2=N/C(C(=O)N2)(C(C)C)C	100	Nontoxic
572	123-33-1	O=C1NNC(=O)C=C1	100	Nontoxic
573	199119-58-9	[Na+].O=C(Nc1nc(cc(OC)n1)OC)[N-]S(=O)(=O)c2ncccc2OCC(F)(F)F	103	Nontoxic
574	145099-21-4	O=C(Nc1nc(cc(OC)n1)OC)NS(=O)(=O)c2ncccc2OCC(F)(F)F	103	Nontoxic
575	317815-83-1	s1c(c(S(=O)(NC(=O)n2c(n(c(n2)OC)C)=O)=O)c(C(=O)OC)c1)C	104	Nontoxic
576	210880-92-5	Clc1ncc(s1)CN/C(=N/C)N[N+]([O-])=O	104.2	Nontoxic
577	109293-97-2	Fc1cc(cc(F)c1)NC(=O)N\N=C(\c2ncccc2C(=O)O)C	106	Nontoxic
578	943832-60-8	Clc1c(N)cc(nc1C(O)=O)c2ccc(Cl)c(OC)c2F	107	Nontoxic
579	15165-67-0	Clc1cc(Cl)ccc1O[C@@H](C(=O)O)C	109	Nontoxic
580	67685-93-2	Clc1ccc(cc1)C(C(C)C)C(=O)OC(c3cccc(Oc2ccccc2)c3)C(N)=O	110	Nontoxic
581	30560-19-1	O=C(NP(=O)(OC)SC)C	110	Nontoxic
582	145701-21-9	Clc1cccc(Cl)c1NS(=O)(=O)c2nc3cc(F)nc(OCC)n3n2	110	Nontoxic
583	74223-64-6	O=C(OC)c1ccccc1S(=O)(=O)NC(=O)Nc2nc(nc(OC)n2)C	113	Nontoxic
584	98886-44-3	O=P(SC(CC)C)(OCC)N1C(=O)SCC1	114	Nontoxic
585	6339-87-3	O=S(=O)(N)c1sccc1	115	Nontoxic
586	55335-06-3	ClC1=C(OCC(O)=O)N=C(Cl)C(Cl)=C1	117	Nontoxic
587	13977-65-6	[K+].OP(O)O	118	Nontoxic
588	77-06-5	O=C1O[C@@]52\C=C/[C@H](O)C1([C@H]5[C@H](C(=O)O)[C@]43[C@H]2CCC(O)(C(=C)\C3)C4)C	120	Nontoxic
589	1300-71-6	Cc1cccc(C)c1O	120	Nontoxic
590	79277-67-1	OC(=O)c1sccc1S(=O)(=O)NC(=O)Nc1nc(OC)nc(C)n1	120	Nontoxic
591	15448-99-4	c12c(S(=O)(=O)N(C1=O)C)cccc2	120	Nontoxic
592	91491-51-9	Clc1c(N)cc(nc1C(O)=O)c2ccc(Cl)c(O)c2F	120	Nontoxic
593	129909-90-6	O=C1N(N)\C(=N/N1C(=O)NC(C)(C)C)C(C)C	120	Nontoxic
594	114311-32-9	CC(C)C1(C(=O)NC(=N1)c2c(cc(cn2)COC)C(=O)O)C	122	Nontoxic
595	15845-66-6	O[P@@](=O)OCC	122	Nontoxic
596	64902-72-3	Clc1ccccc1S(=O)(=O)NC(=O)Nc2nc(nc(OC)n2)C	122	Nontoxic
597	65600-62-6	O[S](=O)(=O)CC(Cl)=C(Cl)Cl	122	Nontoxic
598	120-93-4	O=C1NCCN1	122	Nontoxic
599	81-07-2	O=C2NS(=O)(=O)c1ccccc12	124	Nontoxic
600	6515-38-4	c1(c(nc(Cl)c(c1)Cl)O)Cl	125	Nontoxic
601	153719-23-4	Clc1ncc(s1)CN2\C(=N\[N+]([O-])=O)N(C)COC2	125	Nontoxic
602	1668-54-8	Cc1nc(N)nc(OC)n1	126	Nontoxic
603	97780-06-8	O=C(OC)c1ccccc1S(=O)(=O)NC(=O)Nc2nc(nc(OCC)n2)NC	126	Nontoxic
604	100784-20-1	O=S(=O)(c1c(C(=O)OC)c(Cl)nn1C)NC(=O)Nc2nc(OC)cc(OC)n2	131	Nontoxic
605	30558-43-1	O=C(N(C)C)C(=N\O)\SC	132	Nontoxic
606	26471-62-5	Cc1ccc(cc1\N=C=O)/N=C=O	133	Nontoxic
607	56507-37-0	O=C1\C(=N/NC(=O)N1N)C(C)(C)C	134	Nontoxic
608	37764-25-3	ClC(Cl)C(=O)N(C\C=C)C\C=C	141	Nontoxic
609	140-56-7	[Na+].[O-]S(=O)(=O)/N=N/c1ccc(N(C)C)cc1	143	Nontoxic
610	16606-64-7	O=P(O)(O)C(N)CC	144	Nontoxic
611	79510-48-8	O=C(O)c1ccccc1S(=O)(NC(=O)Nc1nc(C)nc(OC)n1)=O	150	Nontoxic
612	120162-55-2	O=C(Nc1nc(OC)cc(OC)n1)NS(=O)(=O)c2c(cnn2C)c3nn(nn3)C	154	Nontoxic
613	142994-06-7	FC(F)(F)c1ccccc1C(=O)O	160	Nontoxic
614	72178-02-0	Clc2cc(ccc2Oc1cc(C(=O)NS(=O)(=O)C)c([N+]([O-])=O)cc1)C(F)(F)F	170	Nontoxic
615	74051-80-2	O=C1/C(C(=O)CC(CC(SCC)C)C1)=C(\NOCC)CCC	170	Nontoxic
616	119515-38-7	CCC(C)OC(=O)N1CCCCC1CCO	173	Nontoxic
617	53250-83-2	O=C(O)c1ccc(cc1Cl)S(C)(=O)=O	180	Nontoxic
618	41394-05-2	O=C2N(/C(=N\N=C2\c1ccccc1)C)N	190	Nontoxic
619	93697-74-6	O=S(=O)(c1c(C(=O)OCC)cnn1C)NC(=O)Nc2nc(OC)cc(OC)n2	180	Nontoxic
620	142891-20-1	O(C(=O)C(=C/c1c(ccc(N2C(C3=C(C2=O)CCCC3)=O)c1)Cl)\Cl)CC	200	Nontoxic
621	454-92-2	c1(cc(ccc1)C(O)=O)C(F)(F)F	204.8	Nontoxic
622	101205-02-1	O=C2C(\C(=O)CC(C1CCCSC1)C2)=C(\NOCC)CCC	220	Nontoxic
623	99105-77-8	O=C(c1ccc(cc1Cl)S(=O)(=O)C)C2C(=O)CCCC2=O	227	Nontoxic
624	2008-58-4	O=C(N)c1c(Cl)cccc1Cl	240	Nontoxic
625	59682-52-9	O=C(N)P(=O)(O)OCC	300	Nontoxic
626	25954-13-6	P(C(N)=O)(OCC)(=O)[O-].[NH4+]	300	Nontoxic
627	37924-13-3	Cc1cc(ccc1NS(=O)(=O)C(F)(F)F)S(=O)(=O)c2ccccc2	312	Nontoxic
628	117671-01-9	O=S(=O)(c1ncccc1S(=O)(=O)CC)N	314	Nontoxic
629	51235-04-2	O=C1/N=C(\N(C(=O)N1C2CCCCC2)C)N(C)C	320	Nontoxic
630	98565-18-5	C(NCC(=O)N(S(=O)(=O)C)C)P(=O)(O)O	320	Nontoxic
631	81335-77-5	O=C(O)c1c(ncc(c1)CC)/C2=N/C(C(=O)N2)(C(C)C)C	340	Nontoxic
632	42588-37-4	O=C(OCC#C)\C=C(\C=C\CC(C)CCCC(C)C)C	351	Nontoxic
633	144740-54-5	[Na+].O=C(Nc1nc(cc(OC)n1)OC)[N-]S(=O)(=O)c2nc(ccc2C(=O)OC)C(F)(F)F	470	Nontoxic
634	96-45-7	S=C1NCCN1	490	Nontoxic
635	288-88-0	n1cnnc1	498	Nontoxic
636	1066-51-9	O=P(O)(O)CN	520	Nontoxic
637	62-75-9	N(N=O)(C)C	556	Nontoxic
638	106040-48-6	OC(=O)c1ccccc1S(=O)(=O)NC(=O)N(C)c1nc(OC)nc(C)n1	560	Nontoxic
639	130561-48-7	Cc1ccc(cc1)n2c3cccc(c3c(=O)c(n2)C(=O)O)OCCOC	570	Nontoxic
640	108-10-1	CC(C)CC(=O)C	600	Nontoxic
641	77182-82-2	CP(=O)(CCC(C(=O)[O-])N)O.[NH4+]	710	Nontoxic
642	135990-29-3	OC(=O)c1cccc(C)c1S(=O)(=O)NC(=O)Nc1nc(N(C)C)nc(OCC(F)(F)F)n1	730	Nontoxic
643	126535-15-7	O=C(OC)c1cccc(c1S(=O)(=O)NC(=O)Nc2nc(nc(OCC(F)(F)F)n2)N(C)C)C	730	Nontoxic
644	101200-48-0	CC1=NC(=NC(=N1)OC)N(C)C(=O)NS(=O)(=O)C2=CC=CC=C2C(=O)OC	738	Nontoxic
645	69806-34-4	O=C(O)C(Oc2ccc(Oc1ncc(cc1Cl)C(F)(F)F)cc2)C	800	Nontoxic
646	129025-54-3	Clc2ccc(N/1/N=C\C(=O)\C(=C\1CC)C(=O)O)cc2	990	Nontoxic
647	61-82-5	n1cnnc1N	1000	Nontoxic
648	63837-33-2	CCC1OCC(COc2ccc(Oc3ccccc3)cc2)O1	1000	Nontoxic
649	2365-40-4	C(=C(\C)C)\CNc1ncnc2c1[nH]cn2	1000	Nontoxic
650	525-79-1	c12c(NCc3ccco3)ncnc1nc[nH]2	1000	Nontoxic
651	1637-39-4	C/C(=C\CNc1c2c([nH]cn2)ncn1)/CO	1000	Nontoxic
652	123-33-1	O=C1\C=C/C(=O)NN1	1000	Nontoxic
653	70901-12-1	C(C(=O)O)NCP(=O)(O)[O-].[K+]	1227	Nontoxic
654	298-14-6	C(O)(=O)[O-].[K+]	1400	Nontoxic
655	81591-81-3	O=C([O-])CNCP(=O)(O)O.[S+](C)(C)C	1800	Nontoxic
656	52756-25-9	N(c1cc(c(F)cc1)Cl)(C(c1ccccc1)=O)[C@@H](C(OC)=O)C	2012	Nontoxic
657	7647-14-5	[Na+].[Cl-]	6094	Nontoxic
658	67-64-1	CC(=O)C	8000	Nontoxic
659	8061-51-6	S(=O)(=O)(C[C@H](Oc1c(cc(cc1)CCCS(=O)(=O)[O-])OC)Cc1c(c(OC)ccc1)O)[O-].[Na+].[Na+]	7300	Nontoxic
660	22898-01-7	[Na+].FC(F)C(F)(F)C([O-])=O	10000	Nontoxic
661	64-17-5	C(C)O	13200	Nontoxic
662	1302-78-9	O=[Al]O[Al]=O.[Si](=O)=O.O	19000	Nontoxic
663	56-81-5	OCC(O)CO	54000	Nontoxic

## Sheet: RT_test
RT_test
No.	CAS No.	SMILES	Toxicity (mg/L)	Classification
1	65731-84-2	Cl/C(Cl)=C/[C@H]3[C@@H](C(=O)O[C@H](C#N)c2cccc(Oc1ccccc1)c2)C3(C)C	0.00039	Very highly toxic
2	97955-44-7	Cl/C(Cl)=C/C3C(C(=O)OC(C#N)c2cccc(Oc1ccccc1)c2)C3(C)C	0.00069	Very highly toxic
3	118712-89-3	Cl/C(Cl)=C/C2C(C(=O)OCc1c(F)c(F)cc(F)c1F)C2(C)C	0.0007	Very highly toxic
4	72-20-8	Cl\C1=C(/Cl)C2(Cl)C3C4CC(C3C1(Cl)C2(Cl)Cl)C5OC45	0.00073	Very highly toxic
5	54406-48-3	C1([C@@H]([C@@H]1\C=C(/C)C)C(O[C@@H](\C(=C\CC)C)C#C)=O)(C)C	0.0017	Very highly toxic
6	5598-52-7	P(Oc1c(cc(Cl)c(n1)Cl)Cl)(OC)(OC)=O	0.0024	Very highly toxic
7	120928-09-8	n3c1c(cccc1)c(OCCc2ccc(cc2)C(C)(C)C)nc3	0.0038	Very highly toxic
8	175013-18-0	O=C(OC)N(OC)c1ccccc1COc3nn(c2ccc(Cl)cc2)cc3	0.006	Very highly toxic
9	76-44-8	ClC1(C(Cl)2Cl)C(C=CC3Cl)C3C2(Cl)C(Cl)=C1Cl	0.007	Very highly toxic
10	950-37-8	O=C1SC(=N/N1CSP(=S)(OC)OC)\OC	0.01	Very highly toxic
11	33245-39-5	[O-][N+](=O)c1cc(cc([N+]([O-])=O)c1N(CCCl)CCC)C(F)(F)F	0.012	Very highly toxic
12	74115-24-5	Clc3ccccc3c1nnc(nn1)c2c(Cl)cccc2	0.015	Very highly toxic
13	7696-12-0	O=C1\C3=C(/C(=O)N1COC(=O)C2C(\C=C(/C)C)C2(C)C)CCCC3	0.016	Very highly toxic
14	86-50-0	S=P(OC)(OC)SCN1\N=N/c2ccccc2C1=O	0.02	Very highly toxic
15	3064-70-8	S(C(Cl)(Cl)Cl)(C(Cl)(Cl)Cl)(=O)=O	0.029	Very highly toxic
16	639-58-7	[Sn](c1ccccc1)(c1ccccc1)(c1ccccc1)Cl	0.037	Very highly toxic
17	63333-35-7	CN(C1=C(C=C(C=C1C(F)(F)F)[N+](=O)[O-])[N+](=O)[O-])C2=C(C=C(C=C2Br)Br)Br	0.038	Very highly toxic
18	1689-99-2	Brc1cc(C#N)cc(Br)c1OC(=O)CCCCCCC	0.041	Very highly toxic
19	731-27-1	O=S(=O)(N(SC(Cl)(Cl)F)c1ccc(cc1)C)N(C)C	0.045	Very highly toxic
20	9012-76-4	O[C@@H]1O[C@@H]([C@H]([C@@H](O)[C@H]1N)O[C@@H]1O[C@@H]([C@H]([C@@H]([C@H]1N)O)O[C@@H]1O[C@@H]([C@H]([C@@H]([C@H]1NC(OC)=O)O)O[C@@H]1O[C@@H]([C@H]([C@@H]([C@H]1N)O)O[C@@H]1O[C@@H]([C@H]([C@@H]([C@H]1N)O)O[C@@H]1O[C@@H]([C@H]([C@@H]([C@H]1N)O)O[C@@H]1O[C@@H]([C@H]([C@@H]([C@H]1N)O)O[C@@H]1O[C@@H]([C@H]([C@@H]([C@H]1N)O)O[C@@H]1O[C@@H]([C@H]([C@@H]([C@H]1N)O)O)CO)CO)CO)CO)CO)CO)CO)CO)CO	0.05	Very highly toxic
21	72-43-5	ClC(Cl)(Cl)C(c1ccc(OC)cc1)c2ccc(OC)cc2	0.052	Very highly toxic
22	56073-07-5	O=C\1c6c(OC(/O)=C/1C5c2ccccc2CC(c4ccc(c3ccccc3)cc4)C5)cccc6	0.064	Very highly toxic
23	72-54-8	Clc1ccc(cc1)C(c2ccc(Cl)cc2)C(Cl)Cl	0.07	Very highly toxic
24	41198-08-7	CCCSP(=O)(OCC)OC1=C(C=C(C=C1)Br)Cl	0.08	Very highly toxic
25	57-74-9	Cl/C2=C(\Cl)C3(Cl)C1CC(Cl)C(Cl)C1C2(Cl)C3(Cl)Cl	0.09	Very highly toxic
26	129630-19-9	FC(F)Oc1c(Cl)c(nn1C)c2cc(OCC(=O)OCC)c(Cl)cc2F	0.1	Highly toxic
27	78-34-2	CCOP(=S)(OCC)SC1OCCOC1SP(=S)(OCC)OCC	0.118	Highly toxic
28	40487-42-1	[O-][N+](=O)c1c(c(cc([N+]([O-])=O)c1NC(CC)CC)C)C	0.138	Highly toxic
29	17804-35-2	O=C(n1c2ccccc2nc1NC(=O)OC)NCCCC	0.17	Highly toxic
30	133-06-2	N1(C([C@@H]2CC=CC[C@@H]2C1=O)=O)SC(Cl)(Cl)Cl	0.186	Highly toxic
31	1031756-98-5	CC(C1CC1)NC(=O)c2cc(cc(c2NC(=O)c3cc(nn3c4c(cccn4)Cl)Br)Br)Cl	0.195	Highly toxic
32	1317-39-1	[Cu].[Cu].O	0.207	Highly toxic
33	732-11-6	COP(=S)(OC)SCN1C(=O)C2=CC=CC=C2C1=O	0.23	Highly toxic
34	120068-37-3	FC(F)(F)S(=O)c2c(C#N)nn(c1c(Cl)cc(cc1Cl)C(F)(F)F)c2N	0.248	Highly toxic
35	25319-90-8	Clc1cc(c(OCC(=O)SCC)cc1)C	0.3	Highly toxic
36	70124-77-5	FC(F)Oc1ccc(cc1)C(C(=O)OC(C#N)c3cc(Oc2ccccc2)ccc3)C(C)C	0.32	Highly toxic
37	50-65-7	c1(C(Nc2c(cc([N+](=O)[O-])cc2)Cl)=O)c(ccc(c1)Cl)O	0.34	Highly toxic
38	97886-45-8	FC(F)(F)c1nc(c(c(c1C(=O)SC)CC(C)C)C(=O)SC)C(F)F	0.36	Highly toxic
39	12071-83-9	[Zn+2].[S-]C(=S)NC(CNC(=S)[S-])C	0.4	Highly toxic
40	22248-79-9	Clc1cc(C(OP(=O)(OC)OC)=[C@H]Cl)c(Cl)cc1Cl	0.43	Highly toxic
41	27541-88-4	ClC(Cl)C(=O)NC1=C(Cl)C(=O)c2ccccc2C1=O	0.45	Highly toxic
42	13457-18-6	S=P(OCC)(OCC)Oc1nn2cc(c(nc2c1)C)C(=O)OCC	0.48	Highly toxic
43	120-36-5	Clc1cc(Cl)ccc1OC(C(=O)O)C	0.5	Highly toxic
44	62-73-7	O=P(O\C=C(/Cl)Cl)(OC)OC	0.55	Highly toxic
45	10552-74-6	O=[N+]([O-])c1cc(cc(C(=O)OC(C)C)c1)C(=O)OC(C)C	0.56	Highly toxic
46	400882-07-7	FC(F)(F)c2ccccc2C(=O)C(C#N)(c1ccc(cc1)C(C)(C)C)C(=O)OCCOC	0.63	Highly toxic
47	74070-46-5	Clc2c(c(ccc2Oc1ccccc1)[N+]([O-])=O)N	0.67	Highly toxic
48	1003318-67-9	Cc1cc(nn1CC(=O)N2CCC(CC2)c3nc(cs3)C4=NOC(C4)c5c(cccc5F)F)C(F)(F)F	0.69	Highly toxic
49	33089-61-1	N(=C/N(\C=N\c1ccc(cc1C)C)C)\c2ccc(cc2C)C	0.74	Highly toxic
50	65733-16-6	O=C(OC(C)C)\C=C(\C=C\CC(CCCC(OC)(C)C)C)C	0.76	Highly toxic
51	33820-53-0	[O-][N+](=O)c1cc(cc([N+]([O-])=O)c1N(CCC)CCC)C(C)C	0.803	Highly toxic
52	88485-37-4	O1CCOC1CO\N=C(\C(F)(F)F)c1ccc(Cl)cc1	0.86	Highly toxic
53	3878-19-1	n2c1c(cccc1)nc2c3occc3	0.91	Highly toxic
54	3100-04-7	C1(=CC1)C	0.966	Highly toxic
55	29560-84-7	ClC=CCO	0.99	Highly toxic
56	180409-60-3	FC(F)(F)c3ccc(F)c(F)c3C(\NC(=O)Cc1ccccc1)=N\OCC2CC2	1.04	Moderately toxic
57	87546-18-7	O=C(OCCCCC)COc1cc(c(F)cc1Cl)N2C(=O)\C3=C(/C2=O)CCCC3	1.1	Moderately toxic
58	2464-37-1	c12[C@@](c3ccccc3c1ccc(c2)Cl)(C(O)=O)O	1.16	Moderately toxic
59	240494-70-6	Fc1c(F)c(c(F)c(F)c1COC(=O)C2C(/C=C/C)C2(C)C)COC	1.2	Moderately toxic
60	86763-47-5	c1(c(c(CC)ccc1)N(COC(C)C)C(CCl)=O)C	1.3	Moderately toxic
61	79241-46-6	O=C(OCCCC)[C@H](Oc2ccc(Oc1ncc(cc1)C(F)(F)F)cc2)C	1.41	Moderately toxic
62	125225-28-7	Clc1ccc(cc1)CC2C(O)(C(CC2)C(C)C)Cn3ncnc3	1.5	Moderately toxic
63	22781-23-3	O=C(Oc1cccc2OC(Oc12)(C)C)NC	1.55	Moderately toxic
64	8065-48-3	P(OCC)(=O)(OCC)SCCSCC.P(OCC)(OCC)(OCCSCC)=S	1.6	Moderately toxic
65	15972-60-8	ClCC(=O)N(c1c(cccc1CC)CC)COC	1.8	Moderately toxic
66	113614-08-7	FC(F)(F)c2cc(OC(C(=O)NCc1ccccc1)CC)ccc2F	1.86	Moderately toxic
67	148-24-3	c12c(c(ccc1)O)nccc2	2	Moderately toxic
68	5915-41-3	Clc1nc(nc(n1)NC(C)(C)C)NCC	2.2	Moderately toxic
69	11141-17-6	O=C(OC)[C@@]1(O)OC[C@]82[C@@H](OC(=O)/C(=C/C)C)C[C@@H](OC(=O)C)[C@@]7(C(=O)OC)CO[C@@H]([C@@H](O)[C@](C)([C@H]12)[C@]64O[C@]6([C@@H]3[C@@]5(O)/C=C\O[C@H]5O[C@H]4C3)C)[C@@H]78	2.22	Moderately toxic
70	2593-15-9	ClC(Cl)(Cl)c1nc(OCC)sn1	2.4	Moderately toxic
71	20354-26-1	Clc2c(Cl)cc(N1OC(=O)N(C1=O)C)cc2	2.5	Moderately toxic
72	6988-21-2	CNC(=O)Oc1ccccc1C2OCCO2	2.7	Moderately toxic
73	153233-91-1	Fc3cccc(F)c3C/2=N/C(c1c(OCC)cc(cc1)C(C)(C)C)CO\2	2.8	Moderately toxic
74	19044-88-3	[O-][N+](=O)c1cc(cc([N+]([O-])=O)c1N(CCC)CCC)S(=O)(=O)N	2.86	Moderately toxic
75	61213-25-0	FC(F)(F)c1cccc(c1)N2C(=O)C(Cl)C(C2)CCl	3	Moderately toxic
76	135319-73-2	Fc1ccc(cc1)C3(OC3c2ccccc2Cl)Cn4ncnc4	3.14	Moderately toxic
77	79983-71-4	Clc1ccc(c(Cl)c1)C(O)(CCCC)Cn2ncnc2	3.4	Moderately toxic
78	131983-72-7	CC1(C)CC\C(=C/C2=CC=C(Cl)C=C2)C1(O)CN1C=NC=N1	3.6	Moderately toxic
79	90-43-7	c1(c2c(cccc2)O)ccccc1	4	Moderately toxic
80	161050-58-4	O=C(c1cc(cc(c1)C)C)N(NC(=O)c2cccc(OC)c2C)C(C)(C)C	4.2	Moderately toxic
81	23422-53-9	c1(cc(ccc1)\N=C\N(C)C)OC(NC)=O.Cl	4.3	Moderately toxic
82	14930-96-2	C[C@@H]1CCC[C@H](/C=C/C(=O)O[C@]23[C@@H](/C=C/C1)[C@@H](C(=C)[C@H]([C@H]2[C@@H](NC3=O)Cc4ccccc4)C)O)O	4.51	Moderately toxic
83	83-28-3	O=C2c1ccccc1C(=O)C2C(=O)CC(C)C	5	Moderately toxic
84	445-03-4	FC(F)(F)c1c(N)ccc(Cl)c1	5.3	Moderately toxic
85	61432-55-1	O=C(SC(c1ccccc1)(C)C)N2CCCCC2	5.7	Moderately toxic
86	163515-14-8	Cc1csc(C)c1N([C@@H](C)COC)C(=O)CCl	6.3	Moderately toxic
87	919-86-8	O=P(OC)(SCCSCC)OC	6.4	Moderately toxic
88	87818-31-3	O(C2CC1(OC2(C)CC1)C(C)C)Cc3ccccc3C	6.6	Moderately toxic
89	96525-23-4	FC(F)(F)c3cc(C=1C(=O)C(OC=1NC)c2ccccc2)ccc3	7	Moderately toxic
90	94593-79-0	O1CCOC1CO\N=C(/C#N)c1ccccc1	7.1	Moderately toxic
91	85-34-7	Clc1c(c(Cl)ccc1Cl)CC(=O)O	7.5	Moderately toxic
92	1982-49-6	O=C(NC1CCCCC1C)Nc2ccccc2	8.1	Moderately toxic
93	67129-08-2	O=C(N(c1c(cccc1C)C)Cn2nccc2)CCl	8.5	Moderately toxic
94	95-25-0	Clc2cc1c(OC(=O)N1)cc2	9.22	Moderately toxic
95	133-90-4	Clc1cc(C(=O)O)c(Cl)c(N)c1	10	Slightly toxic
96	119-38-0	n1(c(cc(n1)C)OC(N(C)C)=O)C(C)C	10.7	Slightly toxic
97	100-52-7	c1ccccc1C=O	11.2	Slightly toxic
98	61676-87-7	CC1=CC(=C(C=C1)N=C2N(C=CS2)C)C	12	Slightly toxic
99	57369-32-1	O=C3N2c1c(cccc1CC2)CC3	13	Slightly toxic
100	83657-17-4	Clc2ccc(/C=C(/n1ncnc1)[C@@H](O)C(C)(C)C)cc2	14.8	Slightly toxic
101	18691-97-9	O=C(NC)N(c1nc2ccccc2s1)C	15.9	Slightly toxic
102	36701-89-0	FC(F)(F)c1cc(ccc1)Oc2ncccc2C(O)=O	17.3	Slightly toxic
103	30125-63-4	c1(nc(Cl)nc(NC(C)(C)C)n1)N	18	Slightly toxic
104	94361-06-5	Clc1ccc(cc1)C(O)(C(C)C2CC2)Cn3ncnc3	19	Slightly toxic
105	371-40-4	Fc1ccc(N)cc1	19.9	Slightly toxic
106	12122-67-7	[Zn+2].[S-]C(=S)NCCNC(=S)[S-]	20.8	Slightly toxic
107	55219-65-3	Clc2ccc(OC(n1ncnc1)C(O)C(C)(C)C)cc2	21.3	Slightly toxic
108	77501-60-1	Clc2cc(ccc2Oc1cc(C(=O)OCC(=O)O)c([N+]([O-])=O)cc1)C(F)(F)	23	Slightly toxic
109	10265-92-6	O=P(OC)(SC)N	25	Slightly toxic
110	86209-51-0	c1cc(c(C(OC)=O)cc1)S(NC(Nc1nc(cc(n1)OC(F)F)OC(F)F)=O)(=O)=O	29	Slightly toxic
111	60-51-5	O=C(NC)CSP(=S)(OC)OC	30.2	Slightly toxic
112	68049-83-2	Clc3c(OCC#C)cc(N1/N=C2\N(C1=O)CCCC2)c(Cl)c3	33	Slightly toxic
113	57520-17-9	O=C(C)O.CC(O)=O.CC(O)=O.N/C(N)=N\CCCCCCCCNCCCCCCCC\N=C(/N)N	36	Slightly toxic
114	2540-82-1	O=C(N(C=O)C)CSP(=S)(OC)OC	38.3	Slightly toxic
115	7159-96-8	O=C(OCC)Nc1cccc(O)c1	42	Slightly toxic
116	64-19-7	C(C)(O)=O	45	Slightly toxic
117	95977-29-0	C[C@H](C(=O)O)Oc1ccc(cc1)Oc2c(cc(cn2)C(F)(F)F)Cl	50	Slightly toxic
118	7778-39-4	O[As](=O)(O)O	53.1	Slightly toxic
119	79277-27-3	O=C(OC)c1sccc1S(=O)(=O)NC(=O)Nc2nc(nc(OC)n2)C	56.4	Slightly toxic
120	11130-12-4	B(O)(O)O.O.[Na+].O.O.O.O	65	Slightly toxic
121	824-39-5	[Na+].O=[N+]([O-])c1ccccc1[O-]	69	Slightly toxic
122	140-38-5	Clc1ccc(NC(=O)N)cc1	72	Slightly toxic
123	108-62-3	O1C(OC(OC(OC1C)C)C)C	75	Slightly toxic
124	181274-15-7	[Na+].O=S(=O)(/N=C(\[O-])N1/N=C(/OCCC)N(C1=O)C)c2ccccc2C(=O)OC	77.6	Slightly toxic
125	138261-41-3	[O-][N+](=O)NC/1=N/CCN\1Cc2cnc(Cl)cc2	83	Slightly toxic
126	34014-18-1	O=C(N(c1nnc(s1)C(C)(C)C)C)NC	87	Slightly toxic
127	13794-14-4	C([C@@H](Oc1ccccc1)CC)(=O)O	93	Slightly toxic
128	957-51-7	O=C(N(C)C)C(c1ccccc1)c2ccccc2	97	Slightly toxic
129	1702-17-6	Clc1c(nc(Cl)cc1)C(=O)O	99.9	Slightly toxic
130	1332-58-7	[SiH](=O)(O[SiH](=O)O[AlH]=O)O[AlH]=O.O.O	100	Nontoxic
131	999-81-5	[Cl-].ClCC[N+](C)(C)C	100	Nontoxic
132	173159-57-4	O=C(Nc1nc(cc(OC)n1)OC)NS(=O)(=O)c2cc(NC=O)ccc2C(=O)N(C)C	100	Nontoxic
133	208465-21-8	O=C(Nc1nc(cc(OC)n1)OC)NS(=O)(=O)c2cc(CNS(C)(=O)=O)ccc2C(=O)OC	100	Nontoxic
134	123312-89-0	O=C2N(/N=C/c1cccnc1)C\C(=N/N2)C	100	Nontoxic
135	122008-78-0	OC(=O)[C@@H](C)Oc1ccc(cc1)Oc2ccc(cc2F)C#N	100	Nontoxic
136	31972-43-7	O=P(OCC)(Oc1cc(c(cc1)S(=O)C)C)NC(C)C	100	Nontoxic
137	52236-30-3	O=C/1NC(=O)N\N=C\1C(C)(C)C	100	Nontoxic
138	6339-19-1	NC=1/C=N\NC(=O)C=1Cl	100	Nontoxic
139	88805-35-0	C1(CC(C(C(C1)=O)C(CC)=O)=O)C(=O)O	100	Nontoxic
140	619-65-8	c1(ccc(C#N)cc1)C(O)=O	100	Nontoxic
141	2385-85-5	ClC53C1(Cl)C4(Cl)C2(Cl)C1(Cl)C(Cl)(Cl)C5(Cl)C2(Cl)C3(Cl)C4(Cl)Cl	100	Nontoxic
142	127-20-8	[Na+].CC(Cl)(Cl)C([O-])=O	100	Nontoxic
143	84087-01-4	O=C(O)c1c(Cl)ccc2cc(Cl)cnc12	100	Nontoxic
144	946578-00-3	FC(F)(F)c1ncc(cc1)C(C)S(=O)(=NC#N)C	101	Nontoxic
145	143807-66-3	Cc1cc(cc(C)c1)C(=O)N(NC(=O)c3ccc2OCCCc2c3C)C(C)(C)C	106	Nontoxic
146	58842-20-9	C1(\NCCCS1)=C/[N+](=O)[O-]	110	Nontoxic
147	144-21-8	[As](C)(=O)([O-])[O-].[Na+].[Na+]	114	Nontoxic
148	108-78-1	n1c(nc(nc1N)N)N	120	Nontoxic
149	110964-79-9	C(c1c(cc(cc1)S(=O)(=O)C)[N+](=O)[O-])(=O)O	120	Nontoxic
150	39148-24-8	O(P(=O)[O-])CC.O(P(=O)[O-])CC.O(P(=O)[O-])CC.[Al+3]	122	Nontoxic
151	6961-82-6	O=S(=O)(c1ccccc1Cl)N	124	Nontoxic
152	57336-69-3	OC(=O)C(/C#N)=N\OC	130	Nontoxic
153	4849-32-5	O=C(Oc1cccc(c1)NC(=O)N(C)C)NC(C)(C)C	135	Nontoxic
154	478413-45-5	CO/C=C(\c1ccccc1Oc2cc(ncn2)Oc3ccccc3C#N)/C(=O)O	150	Nontoxic
155	34681-23-7	CC(C(=NOC(=O)NC)C)S(=O)(=O)C	170	Nontoxic
156	101-42-8	O=C(Nc1ccccc1)N(C)C	204	Nontoxic
157	98967-40-9	Fc1cccc(F)c1NS(=O)(=O)c2nc3nc(ccn3n2)C	300	Nontoxic
158	120923-37-7	O=C(Nc1nc(OC)cc(OC)n1)NS(=O)(=O)N(C)S(=O)(=O)C	320	Nontoxic
159	122931-48-0	O=C(Nc1nc(OC)cc(OC)n1)NS(=O)(=O)c2ncccc2S(=O)(=O)CC	390	Nontoxic
160	7784-26-1	S(=O)(=O)([O-])[O-].S(=O)(=O)([O-])[O-].O.[Al+3].[NH4+].O.O.O.O.O.O.O.O.O.O.O	523	Nontoxic
161	43222-48-6	S(=O)(=O)(OC)[O-].c1(c2ccccc2)cc([n+](n1C)C)c1ccccc1	694	Nontoxic
162	1338-02-9	CCC1CCC(CC1)CCC(=O)[O-].CCC1CCC(C1)CCC(=O)[O-].[Cu+2]	800	Nontoxic
163	67-97-0	O[C@@H]1CC(\C(=C)CC1)=C\C=C2/CCC[C@]3([C@H]2CC[C@@H]3[C@H](C)CCCC(C)C)C	1000	Nontoxic
164	71-36-3	C(CC)CO	1200	Nontoxic
165	7681-11-0	[K+].[IH-]	2190	Nontoxic
166	107-21-1	OCCO	18500	Nontoxic

## Sheet: LP_train
LP_train
No.	CAS No.	SMILES	Toxicity (mg/L)	Classification
1	1305-99-3	[Ca+2].[Ca+2].[Ca+2].[PH6-3].[PH6-3]	0.000105	Very highly toxic
2	68085-85-8	Cl\C(=C/C3C(C(=O)OC(C#N)c2cccc(Oc1ccccc1)c2)C3(C)C)C(F)(F)F	0.00046	Very highly toxic
3	69409-94-5	c1([C@@H](OC([C@@H](Nc2c(cc(C(F)(F)F)cc2)Cl)C(C)C)=O)C#N)cc(Oc2ccccc2)ccc1	0.0009	Very highly toxic
4	137-30-4	[Zn+2].S=C([S-])N(C)C.[S-]C(=S)N(C)C	0.00097	Very highly toxic
5	8001-35-2	ClC2(Cl)CC1C(C2(C(Cl)C1Cl)CCl)(C(Cl)Cl)CCl	0.0044	Very highly toxic
6	309-00-2	Cl\C3=C(/Cl)C4(Cl)C2C(C1/C=C\C2C1)C3(Cl)C4(Cl)Cl	0.0046	Very highly toxic
7	83121-18-0	Clc1cc(c(F)c(Cl)c1F)NC(=O)NC(=O)c2c(F)cccc2F	0.0065	Very highly toxic
8	8001-50-1	ClC1[C@@]2(Cl)C(C)(C)C(=C)[C@@]1(Cl)C(Cl)(Cl)C2(Cl)Cl	0.0084	Very highly toxic
9	465-73-6	C1([C@@]2([C@@H]3[C@@H]([C@@H]4C=C[C@H]3C4)[C@]1(Cl)C(=C2Cl)Cl)Cl)(Cl)Cl	0.012	Very highly toxic
10	55285-14-8	c12c(CC(O2)(C)C)cccc1OC(N(SN(CCCC)CCCC)C)=O	0.015	Very highly toxic
11	10453-86-8	O=C(OCc1cc(oc1)Cc2ccccc2)C3C(\C=C(/C)C)C3(C)C	0.017	Very highly toxic
12	62924-70-3	Clc1cccc(F)c1CN(c2c([N+]([O-])=O)cc(cc2[N+]([O-])=O)C(F)(F)F)CC	0.023	Very highly toxic
13	26399-36-0	CCCN(CC1CC1)c2c(cc(cc2[N+](=O)[O-])C(F)(F)F)[N+](=O)[O-]	0.023	Very highly toxic
14	584-79-2	O=C2\C(=C(\C)C(OC(=O)C1C(/C=C(/C)C)C1(C)C)C2)C\C=C	0.024	Very highly toxic
15	1336-21-6	[OH-].[NH4+]	0.024	Very highly toxic
16	56634-95-8	Brc1cc(C#N)cc(Br)c1OC(=O)CCCCCC	0.029	Very highly toxic
17	2439-01-2	O=C1Sc2nc3ccc(cc3nc2S1)C	0.0334	Very highly toxic
18	298-04-4	S=P(OCC)(SCCSCC)OCC	0.039	Very highly toxic
19	79622-59-6	[O-][N+](=O)c1c(c([N+]([O-])=O)c(Cl)c(c1)C(F)(F)F)Nc2ncc(cc2Cl)C(F)(F)F	0.055	Very highly toxic
20	131-72-6	O=C(Oc1c(cc(cc1C(C)CCCCCC)[N+]([O-])=O)[N+]([O-])=O)/C=C/C	0.0569	Very highly toxic
21	115-90-2	S=P(Oc1ccc(cc1)S(=O)C)(OCC)OCC	0.072	Very highly toxic
22	72459-58-6	Clc2ccc1nc(n[n+]([O-])c1c2)n3ccnc3	0.077	Very highly toxic
23	72619-32-0	C[C@H](C(=O)OC)Oc1ccc(cc1)Oc2c(cc(cn2)C(F)(F)F)Cl	0.088	Very highly toxic
24	96182-53-5	c1(ncc(O[P@@](=S)(OC(C)C)OCC)cn1)C(C)(C)C	0.089	Very highly toxic
25	77501-63-4	Clc2cc(ccc2Oc1cc(C(=O)OC(CC)C(=O)OCC)c(cc1)[N+]([O-])=O)C(F)(F)F	0.1	Highly toxic
26	162650-77-3	CCNc1nc(CC)c(s1)C(=O)NC(C#N)c2cccs2	0.102	Highly toxic
27	2032-59-9	O=C(Oc1cc(c(cc1)N(C)C)C)NC	0.11	Highly toxic
28	137-42-8	[Na+].[S-]C(=S)NC	0.175	Highly toxic
29	71283-80-2	O=C(OCC)[C@H](Oc3ccc(Oc1nc2ccc(Cl)cc2o1)cc3)C	0.19	Highly toxic
30	105512-06-9	O=C(OCC#C)[C@H](Oc2ccc(Oc1ncc(Cl)cc1F)cc2)C	0.21	Highly toxic
31	100646-51-3	O=C(OCC)[C@H](Oc3ccc(Oc1nc2ccc(Cl)cc2nc1)cc3)C	0.21	Highly toxic
32	14816-18-3	N#C/C(=N\OP(=S)(OCC)OCC)c1ccccc1	0.22	Highly toxic
33	534-52-1	[O-][N+](=O)c1cc([N+]([O-])=O)cc(c1O)C	0.23	Highly toxic
34	10380-28-6	c1c2cccc([O-])c2ncc1.[Cu+2].c1c2c(ncc1)c(ccc2)[O-]	0.24	Highly toxic
35	13684-56-5	O=C(Oc1cccc(c1)NC(=O)OCC)Nc2ccccc2	0.25	Highly toxic
36	95737-68-1	O(c1ncccc1)C(COc3ccc(Oc2ccccc2)cc3)C	0.27	Highly toxic
37	13194-48-4	O=P(SCCC)(OCC)SCCC	0.32	Highly toxic
38	70-38-2	CC(=CC1C(C(=O)OCc2ccc(C)cc2C)C1(C)C)	0.32	Highly toxic
39	108173-90-6	N(=C(\N)N)\CCCCCCCCNCCCCCCCC/N=C(\N)N	0.42	Highly toxic
40	23184-66-9	CCCCOCN(C1=C(C=CC=C1CC)CC)C(=O)CCl	0.44	Highly toxic
41	115-32-2	Clc1ccc(cc1)C(O)(c2ccc(Cl)cc2)C(Cl)(Cl)Cl	0.51	Highly toxic
42	69806-50-4	O=C(OCCCC)C(Oc2ccc(Oc1ncc(cc1)C(F)(F)F)cc2)C	0.53	Highly toxic
43	36734-19-7	O=C2N(c1cc(Cl)cc(Cl)c1)C(=O)CN2C(=O)NC(C)C	0.55	Highly toxic
44	149877-41-8	O=C(OC(C)C)NNc1cc(ccc1OC)c2ccccc2	0.58	Highly toxic
45	80-33-1	C1=CC(=CC=C1OS(=O)(=O)C2=CC=C(C=C2)Cl)Cl	0.7	Highly toxic
46	500-28-7	c1(OP(OC)(OC)=S)cc(c([N+](=O)[O-])cc1)Cl	0.71	Highly toxic
47	78-48-8	CCCCSP(=O)(SCCCC)SCCCC	0.72	Highly toxic
48	3478-94-2	Clc1ccc(cc1Cl)C(=O)OCCCN2C(CCCC2)C	0.77	Highly toxic
49	41483-43-6	CCCCC1=C(N=C(N=C1OS(=O)(=O)N(C)C)NCC)C	1	Moderately toxic
50	4658-28-0	[N-]=[N+]=N/c1nc(nc(SC)n1)NC(C)C	1	Moderately toxic
51	22936-86-3	CC(C)Nc1nc(Cl)nc(NC2CC2)n1	1.28	Moderately toxic
52	60238-56-4	CCOP(=S)(OCC)Oc1cc(Cl)c(SC)cc1Cl	1.3	Moderately toxic
53	59669-26-0	O=C(ON=C(SC)C)N(SN(C(=O)ON=C(SC)C)C)C	1.4	Moderately toxic
54	88-04-0	c1(c(cc(O)cc1C)C)Cl	1.6	Moderately toxic
55	25311-71-1	c1(c(O[P@@](NC(C)C)(OCC)=S)cccc1)C(OC(C)C)=O	1.8	Moderately toxic
56	67306-00-7	c1cc(ccc1CC(CN2CCCCC2)C)C(C)(C)C	1.9	Moderately toxic
57	142459-58-3	O=C(N(c1ccc(F)cc1)C(C)C)COc2nnc(s2)C(F)(F)F	2.13	Moderately toxic
58	67564-91-4	O2[C@H](CN(CC(C)Cc1ccc(cc1)C(C)(C)C)C[C@H]2C)C	2.3	Moderately toxic
59	1570-64-5	c1(c(ccc(c1)Cl)O)C	2.3	Moderately toxic
60	6386-63-6	Clc1cc(c(OCC(=O)O)cc1)CO	2.3	Moderately toxic
61	76578-14-8	O=C(OCC)C(Oc3ccc(Oc1nc2ccc(Cl)cc2nc1)cc3)C	2.8	Moderately toxic
62	25059-80-7	Clc2cccc1SC(=O)N(c12)CC(=O)OCC	2.8	Moderately toxic
63	112410-23-8	O=C(c1cc(cc(c1)C)C)N(NC(=O)c2ccc(cc2)CC)C(C)(C)C	3	Moderately toxic
64	78587-05-0	Clc1ccc(cc1)C3SC(=O)N(C(=O)NC2CCCCC2)[C@H]3C	3.2	Moderately toxic
65	112281-77-3	FC(F)C(F)(F)OCC(c1ccc(Cl)cc1Cl)Cn2ncnc2	4.3	Moderately toxic
66	15879-93-3	C(C([C@@H]1[C@@H]([C@@H]2 C(O1)O[C@@H](O2)C(Cl)(Cl)Cl)O)O)O	5	Moderately toxic
67	66332-96-5	CC(C)OC1=CC=CC(=C1)NC(=O)C2=CC=CC=C2C(F)(F)F	5.4	Moderately toxic
68	87820-88-0	O=C2/C(C(=O)CC(c1c(cc(cc1C)C)C)C2)=C(\NOCC)CC	6.1	Moderately toxic
69	98730-04-2	ClC(Cl)C(=O)N1c2c(OCC1C)cccc2	6.5	Moderately toxic
70	88283-41-4	Clc2ccc(C(=NOC)Cc1cccnc1)c(Cl)c2	6.6	Moderately toxic
71	118134-30-8	O1CC(OC12CCC(CC2)C(C)(C)C)CN(CC)CCC	7.13	Moderately toxic
72	1114-71-2	O=C(SCCC)N(CCCC)CC	7.4	Moderately toxic
73	72850-64-7	FC(F)(F)c2nc(Cl)sc2C(=O)OCc1ccccc1	8.5	Moderately toxic
74	100-51-6	OCc1ccccc1	10	Slightly toxic
75	504-24-5	c1(ccncc1)N	10.4	Slightly toxic
76	175217-20-6	Cc1c(sc(c1C(=O)NCC=C)[Si](C)(C)C)C	11	Slightly toxic
77	63284-71-9	Fc1ccc(cc1)C(O)(c2ccccc2Cl)c3cncnc3	12.1	Slightly toxic
78	759-94-4	O=C(SCC)N(CCC)CCC	14	Slightly toxic
79	69377-81-7	Fc1nc(OCC(=O)O)c(Cl)c(c1Cl)N	14.3	Slightly toxic
80	630-20-6	C(CCl)(Cl)(Cl)Cl	16	Slightly toxic
81	106-93-4	C(CBr)Br	18	Slightly toxic
82	35256-85-0	O=C(N(C(C)C)Cc1ccccc1)C(C)(C)C	19	Slightly toxic
83	1330-20-7	Cc1c(C)cccc1	19.9	Slightly toxic
84	111-30-8	C(CC=O)CC=O	22.6	Slightly toxic
85	3813-05-6	Clc2cccc1SC(=O)N(c12)CC(=O)O	27	Slightly toxic
86	57966-95-7	N#C/C(=N\OC)C(=O)NC(=O)NCC	29	Slightly toxic
87	103055-07-8	Clc1cc(c(Cl)cc1OC(F)(F)C(F)C(F)(F)F)NC(=O)NC(=O)c2c(F)cccc2F	29	Slightly toxic
88	1689-84-5	Oc1c(Br)cc(cc1Br)C#N	29.2	Slightly toxic
89	76674-21-0	C1=CC=C(C(=C1)C(CN2C=NC=N2)(C3=CC=C(C=C3)F)O)F	33	Slightly toxic
90	21452-18-6	c1ccccc1NC(=O)c1c(C)nc(C)s1	34	Slightly toxic
91	314-40-9	CCC(C)N1C(=O)C(=C(NC1=O)C)Br	36	Slightly toxic
92	60-00-4	N(CCN(CC(O)=O)CC(O)=O)(CC(O)=O)CC(O)=O	41	Slightly toxic
93	13952-84-6	NC(C)CC	46	Slightly toxic
94	114420-56-3	n1cc(Cl)cc(F)c1Oc1ccc(O[C@H](C)C(=O)O)cc1	76	Slightly toxic
95	149979-41-9	CC/C(=N\OC\C=C\Cl)/C=1C(=O)CC(CC=1O)C2CCOCC2	82.5	Slightly toxic
96	40596-80-3	C(\C=C(\C=C\C[C@@H](CCCC(C)(C)OC)C)C)(=O)SCC	87	Slightly toxic
97	3337-71-1	c1(S(NC(OC)=O)(=O)=O)ccc(N)cc1	91.3	Slightly toxic
98	2302-17-2	[Na+].O=S(=O)(c1ccc(N)cc1)NC(=O)OC	91.5	Slightly toxic
99	365400-11-9	c1(C)c(c(O)n(C)n1)C(c1c(cc(cc1)C(F)(F)F)S(=O)(=O)C)=O	93.5	Slightly toxic
100	122836-35-5	O=S(=O)(Nc2c(Cl)cc(Cl)c(N1/N=C(\N(C1=O)C(F)F)C)c2)C	93.8	Slightly toxic
101	129630-17-7	Cn2nc(c1cc(OCC(=O)O)c(Cl)cc1F)c(Cl)c2OC(F)F	100	Nontoxic
102	150-68-5	Clc1ccc(NC(=O)N(C)C)cc1	100	Nontoxic
103	75-60-5	[As](C)(C)(O)=O	100	Nontoxic
104	86479-06-3	Clc1cc(cc(Cl)c1OC(F)(F)C(F)F)NC(=O)NC(=O)c2c(F)cccc2F	100	Nontoxic
105	75-99-0	C(C(O)=O)(C)(Cl)Cl	105	Nontoxic
106	144651-06-9	O=C(OC1COC1)c2c(cccc2)S(=O)(=O)NC(=O)Nc3nc(cc(n3)C)C	111	Nontoxic
107	104206-82-8	CS(=O)(=O)C1=CC(=C(C=C1)C(=O)C2C(=O)CCCC2=O)[N+](=O)[O-]	120	Nontoxic
108	858956-08-8	C1CC1c2nc(c(c(n2)N)Cl)C(=O)O	120	Nontoxic
109	122-88-3	Clc1ccc(OCC(=O)O)cc1	180	Nontoxic
110	9007-20-9	c1ccc2cc(ccc2c1)OCC(CO)(CO)CCl	180	Nontoxic
111	78-87-5	ClCC(Cl)C	280	Nontoxic
112	1314-13-2	O=[Zn]	320	Nontoxic
113	81-82-3	Clc1ccc(cc1)C(C=2C(=O)c3c(OC=2O)cccc3)CC(=O)C	340	Nontoxic
114	57213-69-1	c1(c(cc(Cl)c(n1)Cl)Cl)OCC(O)=O.N(CC)(CC)CC	471	Nontoxic
115	111-76-2	C(OCCO)CCC	524	Nontoxic
116	116-29-0	Clc1cc(c(Cl)cc1Cl)S(=O)(=O)c2ccc(Cl)cc2	880	Nontoxic
117	34205-21-5	O=C2O\C(=N/N2c1c(Cl)cc(NC(=O)N(C)C)cc1)C(C)(C)C	1000	Nontoxic
118	123-91-1	C1COCCO1	3494	Nontoxic
119	52508-35-7	[Na+].[O-]C(=O)[C@@]21OC(O[C@H]1[C@@H]3OC(OC[C@@H]3O2)(C)C)(C)C	10000	Nontoxic
120	109-86-4	C(CO)OC	10000	Nontoxic

## Sheet: LP_test
LP_test
No.	CAS No.	SMILES	Toxicity (mg/L)	Classification
1	76703-62-3	C1([C@@H]([C@@H]1\C=C(\C(F)(F)F)Cl)C(=O)O[C@@H](c1cc(ccc1)Oc1ccccc1)C#N)(C)C	3.5e-05	Very highly toxic
2	13071-79-9	S=P(OCC)(SCSC(C)(C)C)OCC	0.004	Very highly toxic
3	56-35-9	[Sn](O[Sn](CCCC)(CCCC)CCCC)(CCCC)(CCCC)CCCC	0.0076	Very highly toxic
4	64628-44-0	O=C(c1ccccc1Cl)NC(=O)Nc2ccc(OC(F)(F)F)cc2	0.021	Very highly toxic
5	944-22-9	S=P(Sc1ccccc1)(OCC)CC	0.028	Very highly toxic
6	131-72-6	O=C(Oc1c(cc(cc1C(C)CCCCCC)[N+]([O-])=O)[N+]([O-])=O)/C=C/C	0.0569	Very highly toxic
7	82-68-8	Clc1c(c(Cl)c(Cl)c(Cl)c1Cl)[N+]([O-])=O	0.1	Highly toxic
8	1563-66-2	CC2(C)CC1=C(C(=CC=C1)OC(NC)=O)O2	0.18	Highly toxic
9	119738-06-6	O=C(OCC1OCCC1)C(Oc4ccc(Oc2nc3c(nc2)cc(Cl)cc3)cc4)C	0.23	Highly toxic
10	533-74-4	S=C1SCN(C)CN1C	0.3	Highly toxic
11	22212-55-1	Clc2ccc(N(C(=O)c1ccccc1)C(C(=O)OCC)C)cc2Cl	0.494	Highly toxic
12	81262-93-3	O=C2N(c1cc(Cl)cc(Cl)c1)C(=O)CN2C(=O)NC(C)C	0.55	Highly toxic
13	16752-77-5	C/C(=N\OC(=O)NC)SC	0.63	Highly toxic
14	122008-85-9	O=C(OCCCC)[C@H](Oc2ccc(Oc1ccc(C#N)cc1F)cc2)C	1.19	Moderately toxic
15	130000-40-7	FC(F)(F)c2nc(sc2C(=O)Nc1c(Br)cc(OC(F)(F)F)cc1Br)C	1.3	Moderately toxic
16	38641-94-0	C(NCC(O)=O)P(O)(=O)O.C(C)(C)N	2	Moderately toxic
17	53716-50-0	c12c([nH]c(n2)NC(OC)=O)ccc(c1)[S@@](c1ccccc1)=O	2.7	Moderately toxic
18	114-26-1	O=C(Oc1ccccc1OC(C)C)NC	6.2	Moderately toxic
19	80-38-6	Clc2ccc(OS(=O)(=O)c1ccccc1)cc2	8.5	Moderately toxic
20	35400-43-2	S=P(Oc1ccc(SC)cc1)(OCC)SCCC	11	Slightly toxic
21	60207-31-0	Clc1cc(Cl)c(cc1)C2(OCCO2)Cn3ncnc3	18	Slightly toxic
22	76738-62-0	n1c[n@]([C@@H]([C@H](C(C)(C)C)O)Cc2ccc(cc2)Cl)nc1.n1c[n@](nc1)[C@H]([C@@H](C(C)(C)C)O)Cc1ccc(cc1)Cl	23.6	Slightly toxic
23	122-42-9	O=C(OC(C)C)Nc1ccccc1	32	Slightly toxic
24	420-04-2	N#CN	43.1	Slightly toxic
25	122-34-9	Clc1nc(nc(n1)NCC)NCC	90	Slightly toxic
26	144550-36-7	[Na+].Cc2nc(NC(=O)[N-]S(=O)(=O)c1cc(I)ccc1C(=O)OC)nc(OC)n2	100	Nontoxic
27	185119-76-0	c1(c(S(=O)(=O)NC(Nc2nc(nc(OC)n2)C)=O)cc(cc1)I)C(=O)O	100	Nontoxic
28	1596-84-5	O=C(NN(C)C)CCC(=O)O	149	Nontoxic
29	1332-07-6	B([O-])([O-])[O-].B([O-])([O-])[O-].[Zn+2].[Zn+2].[Zn+2]	335	Nontoxic
30	123343-16-8	[Na+].[O-]C(=O)c2c(Sc1nc(OC)cc(OC)n1)cccc2Cl	930	Nontoxic
31	10043-52-4	[Cl-].[Ca+2].[Cl-]	10240	Nontoxic

## Sheet: Others_train
Others_train
No.	CAS No.	SMILES	Toxicity (mg/L)	Classification
1	68359-37-5	Cl/C(Cl)=C/[C@H]3[C@@H](C(=O)O[C@@H](C#N)c2ccc(F)c(Oc1ccccc1)c2)C3(C)C	6.8e-05	Very highly toxic
2	66230-04-4	Clc1ccc(cc1)[C@H](C(=O)O[C@@H](C#N)c3cccc(Oc2ccccc2)c3)C(C)C	0.0001	Very highly toxic
3	27304-13-8	Cl\C1=C(/Cl)C2(Cl)C(Cl)(Cl)C1(Cl)C4C2C3OC3(Cl)C4Cl	0.002	Very highly toxic
4	297-78-9	Cl/C1=C(\Cl)C2(Cl)C(Cl)(Cl)C1(Cl)C3C2C(Cl)OC3Cl	0.002	Very highly toxic
5	223419-20-3	C1([C@@H](\C=C\C)[C@@H]1C(OCc1c(c(c(C)c(F)c1F)F)F)=O)(C)C	0.0029	Very highly toxic
6	111872-58-3	BrC(F)(F)Oc1ccc(cc1)C(C)(C)COCc3cc(Oc2ccccc2)ccc3	0.0035	Very highly toxic
7	1031-07-8	Cl\C1=C(/Cl)C3(Cl)C(Cl)(Cl)C1(Cl)C2C3COS(=O)(=O)OC2	0.01	Very highly toxic
8	3761-41-9	COP(=S)(OC)Oc1ccc(S(=O)C)c(C)c1	0.01	Very highly toxic
9	118-75-2	ClC=1C(=O)C(\Cl)=C(\Cl)C(=O)C=1Cl	0.01	Very highly toxic
10	12069-69-1	[Cu+2].[Cu+2].[OH-].[OH-].[O-]C([O-])=O	0.017	Very highly toxic
11	23505-41-1	CCOP(=S)(OCC)Oc1cc(C)nc(n1)N(CC)CC	0.02	Very highly toxic
12	70-30-4	OC1=C(C=C(C(=C1CC2=C(C(=CC(=C2Cl)Cl)Cl)O)Cl)Cl)Cl	0.021	Very highly toxic
13	77458-01-6	O=P(OCC)(SCCC)Oc1cn(nc1)c2ccc(Cl)cc2	0.028	Very highly toxic
14	4097-36-3	c1(c(c(cc(c1)[N+](=O)[O-])[N+](=O)[O-])O)[C@@H](CCC)C	0.03	Very highly toxic
15	3861-47-0	Ic1cc(C#N)cc(I)c1O.CCCCCCCC(O)=O	0.043	Very highly toxic
16	88-85-7	CCC(C)c1cc(cc([N+](=O)[O-])c1O)[N+](=O)[O-]	0.044	Very highly toxic
17	527-20-8	C1(=C(C(=C(C(=C1Cl)Cl)Cl)Cl)Cl)N	0.056	Very highly toxic
18	13121-70-5	O[Sn](C1CCCCC1)(C2CCCCC2)C3CCCCC3	0.06	Very highly toxic
19	142-71-2	[Cu+2].[O-]C(=O)C.[O-]C(=O)C	0.069	Very highly toxic
20	14484-64-1	[Fe+3].S=C([S-])N(C)C.[S-]C(=S)N(C)C.[S-]C(=S)N(C)C	0.09	Very highly toxic
21	297-97-2	S=P(Oc1nccnc1)(OCC)OCC	0.09	Very highly toxic
22	2104-96-3	Clc1cc(OP(=S)(OC)OC)c(Cl)cc1Br	0.08	Very highly toxic
23	4824-78-6	CCOP(=S)(OCC)OC1=CC(=C(C=C1Cl)Br)Cl	0.18	Highly toxic
24	111479-05-1	O=C(OCCO\N=C(/C)C)C(Oc3ccc(Oc1nc2ccc(Cl)cc2nc1)cc3)C	0.19	Highly toxic
25	229977-93-9	O=C(OC)\C(=C\OC)c1ccccc1COc2nc(OC(C)C)nc(c2)C(F)(F)F	0.195	Highly toxic
26	555-37-3	Clc1ccc(NC(=O)N(CCCC)C)cc1Cl	0.32	Highly toxic
27	1468-37-7	COC(=S)SSC(=S)OC	0.34	Highly toxic
28	87310-56-3	C(=O)(CCl)N(c1c(cccc1CC)CC)COC/C=C\C	0.48	Highly toxic
29	21757-82-4	Clc1ccc(cc1Cl)C(OC(=O)C)C(Cl)(Cl)Cl	0.5	Highly toxic
30	103-33-3	N(=N/c1ccccc1)\c2ccccc2	0.5	Highly toxic
31	563-12-2	S=P(SCSP(=S)(OCC)OCC)(OCC)OCC	0.5	Highly toxic
32	201593-84-2	Clc2c(cc(cc2NC(=O)NC(=O)c1c(F)cccc1F)C(F)(F)F)C(F)(F)F	0.5	Highly toxic
33	101-27-9	Clc1cc(NC(=O)OCC#CCCl)ccc1	0.53	Highly toxic
34	5707-69-7	CC1=NOC(=O)C1=NNc2ccccc2Cl	0.55	Highly toxic
35	120116-88-3	O=S(=O)(n1c(c(Cl)nc1C#N)c2ccc(cc2)C)N(C)C	0.56	Highly toxic
36	84-74-2	CCCCOC(=O)c1ccccc1C(=O)OCCCC	0.6	Highly toxic
37	40642-40-8	C(CCCCCC\C=C/CCC)O	0.685	Highly toxic
38	112-72-1	C(CCCCCCC)CCCCCCO	0.685	Highly toxic
39	5989-27-5	C=C(\[C@H]1C/C=C(/C)CC1)C	0.702	Highly toxic
40	319-84-6	Cl[C@H]1[C@@H]([C@@H]([C@@H](Cl)[C@@H]([C@H]1Cl)Cl)Cl)Cl	0.82	Highly toxic
41	82558-50-7	O=C(Nc1onc(c1)C(CC)(C)CC)c2c(OC)cccc2OC	0.87	Highly toxic
42	2699-79-8	S(=O)(=O)(F)F	0.89	Highly toxic
43	958647-10-4	COc1ccccc1N\2CCS/C2=C(\C#N)/Sc3cc(ccc3F)C(F)(F)F	0.9	Highly toxic
44	658066-35-4	c1(ccccc1C(F)(F)F)C(NCCc1c(cc(cn1)C(F)(F)F)Cl)=O	0.98	Highly toxic
45	28249-77-6	CCN(CC)C(=O)SCC1=CC=C(C=C1)Cl	0.98	Highly toxic
46	83130-01-2	O=C(OCC)CCN(SN(C(=O)O\N=C(/SC)C)C)Cc1ccccc1	0.99	Highly toxic
47	224049-04-1	c1(snc(c1Cl)Cl)C(=O)Nc1c(cccc1)C#N	1	Moderately toxic
48	10043-01-3	[Al+3].[Al+3].[O-]S(=O)(=O)[O-].[O-]S([O-])(=O)=O.[O-]S([O-])(=O)=O	1.05	Moderately toxic
49	38421-90-8	C(CC\C=C\CCCC)COC(C)=O	1.09	Moderately toxic
50	99-86-5	C=1(C(C)C)CCC(C)=CC1	1.17	Moderately toxic
51	125306-83-4	O=S(=O)(c1ncn(n1)C(=O)N(CC)CC)c2c(cc(cc2C)C)C	1.2	Moderately toxic
52	2274-74-0	c1(c(cc(Cl)c(c1)Cl)Cl)\N=N\Sc1ccc(Cl)cc1	1.4	Moderately toxic
53	25171-63-5	C(O\N=C(/SCCC#N)C)(=O)NC	1.5	Moderately toxic
54	80-06-8	C(c1ccc(Cl)cc1)(c1ccc(Cl)cc1)(C)O	1.52	Moderately toxic
55	123572-88-3	Clc1n(nc(c1C(=O)Nc2cccc3c2C(OC3(C)C)C)C)C	1.56	Moderately toxic
56	18854-01-8	S=P(Oc2noc(c1ccccc1)c2)(OCC)OCC	1.7	Moderately toxic
57	36519-00-3	O=P(OCC)(Oc1c(Cl)cc(Cl)cc1)Oc1c(Cl)cc(Cl)cc1	1.7	Moderately toxic
58	29104-30-1	Clc1ccc(OC)c(c1OC)C(=N\OCC)\OC(=O)c2ccccc2	1.75	Moderately toxic
59	8044-71-1	[Br-].C(CCCC[N+](C)(C)C)CCCCCCCCCCC	1.81	Moderately toxic
60	36001-88-4	c1([N+]([O-])=O)c(O[P@@](NC(C)C)(=S)OC)ccc(c1)C	1.9	Moderately toxic
61	66952-49-6	O=C(Sc1ccc(OS(=O)(=O)C)cc1)NC	1.95	Moderately toxic
62	1593-77-7	O2C(CN(C1CCCCCCCCCCC1)CC2C)C	2.2	Moderately toxic
63	2274-67-1	Clc1cc(Cl)ccc1C(OP(=O)(OC)OC)=[C@H]Cl	2.3	Moderately toxic
64	112-30-1	C(CCCCC)CCCCO	2.4	Moderately toxic
65	135590-91-9	Clc1cc(Cl)c(cc1)N2/N=C(/C(=O)OCC)CC2(C(=O)OCC)C	2.4	Moderately toxic
66	58667-63-3	Fc2ccc(N(C(=O)c1ccccc1)C(C(=O)O)C)cc2Cl	2.4	Moderately toxic
67	24934-91-6	ClCSP(=S)(OCC)OCC	2.5	Moderately toxic
68	2597-03-7	O=C(OCC)C(SP(=S)(OC)OC)c1ccccc1	2.5	Moderately toxic
69	60207-90-1	Clc1ccc(c(Cl)c1)C2(OCC(O2)CCC)Cn3ncnc3	2.6	Moderately toxic
70	63-25-2	c12c(OC(NC)=O)cccc1cccc2	2.6	Moderately toxic
71	75-15-0	S=C=S	3	Moderately toxic
72	35148-19-7	C(CCCC\C=C\CC)CCCOC(C)=O	3.16	Moderately toxic
73	2961-62-8	c1(cc(c([O-])c(c1)I)I)C#N.[Na+]	3.3	Moderately toxic
74	29973-13-5	O=C(Oc1ccccc1CSCC)NC	3.4	Moderately toxic
75	34622-58-7	Clc1ccccc1CSC(=O)N(CC)CC	3.4	Moderately toxic
76	81412-43-3	O1C(CN(CCCCCCCCCCCCC)CC1C)C	3.4	Moderately toxic
77	52570-16-8	O=C(Nc1ccccc1)C(Oc3ccc2c(cccc2)c3)C	3.5	Moderately toxic
78	20856-57-9	c1(N[C@@H](NC=O)C(Cl)(Cl)Cl)cc(c(Cl)cc1)Cl	3.7	Moderately toxic
79	71626-11-4	O=C(N(c1c(cccc1C)C)C(C(=O)OC)C)Cc2ccccc2	3.75	Moderately toxic
80	134605-64-4	O=C(OC\C=C)C(OC(=O)c1cc(ccc1Cl)N2C(=O)\C=C(/N(C2=O)C)C(F)(F)F)(C)C	3.9	Moderately toxic
81	90-15-3	Oc1cccc2ccccc12	4.24	Moderately toxic
82	126-22-7	CCCC(=O)OC(C(Cl)(Cl)Cl)P(=O)(OC)OC	5	Moderately toxic
83	133220-30-1	O=C2c1ccccc1C(=O)C2(CC)CC3(OC3)c4cccc(Cl)c4	5	Moderately toxic
84	153197-14-9	c1(cc(Cl)cc(Cl)c1)C(C)(C)N1C(C(=C(OC1)C)c1ccccc1)=O	5	Moderately toxic
85	51-03-6	O1c2cc(c(cc2OC1)COCCOCCOCCCC)CCC	5.3	Moderately toxic
86	106-48-9	Oc1ccc(Cl)cc1	5.4	Moderately toxic
87	1912-26-1	Clc1nc(nc(n1)N(CC)CC)NCC	5.5	Moderately toxic
88	104030-54-8	O=C(NC(c1ccc(Cl)cc1)C)C2(CC)C(C)C2(Cl)Cl	5.6	Moderately toxic
89	115852-48-7	Clc1cc(Cl)ccc1OC(C(=O)NC(C#N)(C)C(C)C)C	5.9	Moderately toxic
90	73250-68-7	O=C(N(c1ccccc1)C)COc2nc3ccccc3s2	6	Moderately toxic
91	330-54-1	Clc1ccc(NC(=O)N(C)C)cc1Cl	6.7	Moderately toxic
92	223580-51-6	Cc1nnsc1C(=O)Nc1ccc(C)c(Cl)c1	7	Moderately toxic
93	51249-05-9	C1(CCCCC1)(NCCCC)P(=O)(OCCCC)OCCCC	7	Moderately toxic
94	174212-12-5	O=C(N2C(C)(CCCc1ccc(Cl)cc1)OCC2(C)C)n3ccnc3.OC(=O)/C=C/C(O)=O	7.2	Moderately toxic
95	101-21-3	Clc1cc(NC(=O)OC(C)C)ccc1	7.5	Moderately toxic
96	2425-10-7	c1(cc(c(C)cc1)C)OC(NC)=O	7.5	Moderately toxic
97	62850-32-2	CN(C)C(=O)SCCCCOc1ccccc1	7.9	Moderately toxic
98	2636-26-2	S=P(Oc1ccc(C#N)cc1)(OC)OC	8.2	Moderately toxic
99	2581-34-2	c1(c(cc(O)cc1)C)[N+](=O)[O-]	8.4	Moderately toxic
100	3811-49-2	COP1(=S)OCc2ccccc2O1	8.8	Moderately toxic
101	68157-60-8	Clc2nccc(NC(=O)Nc1ccccc1)c2	8.8	Moderately toxic
102	106-89-8	C1[C@@H](O1)CCl	9.1	Moderately toxic
103	29547-00-0	C(SS([O-])(=O)=O)[C@@H](CSS(O)(=O)=O)N(C)C.[Na+]	9.2	Moderately toxic
104	74712-19-9	c1(C(NC([C@@H](C(C)(C)C)Br)=O)(C)C)ccccc1	9.6	Moderately toxic
105	535-89-7	Clc1nc(cc(n1)N(C)C)C	9.7	Moderately toxic
106	1836-77-7	c1(Oc2ccc([N+](=O)[O-])cc2)c(cc(Cl)cc1Cl)Cl	9.8	Moderately toxic
107	21725-46-2	Clc1nc(nc(n1)NC(C#N)(C)C)NCC	9.8	Moderately toxic
108	156963-66-5	O=S(=O)(c1ccc(c(Cl)c1)C(=O)C=3C(=O)C4CCC(C=3Sc2ccccc2)C4)C	10	Slightly toxic
109	16974-11-1	C(CCCC\C=C/CC)CCCOC(C)=O	10	Slightly toxic
110	570415-88-2	O=C(Nc1nc(OC)cc(OC)n1)NS(=O)(=O)c2c(Cl)nc3ccc(nn23)CCC	10	Slightly toxic
111	2303-16-4	ClC(=[C@H]Cl)CSC(=O)N(C(C)C)C(C)C	10.1	Slightly toxic
112	107-13-1	C(C#N)=C	10.1	Slightly toxic
113	14214-32-5	COc1ccc(Oc2ccc(NC(=O)N(C)C)cc2)cc1	10.7	Slightly toxic
114	26225-79-6	O=S(=O)(Oc2cc1c(OC(OCC)C1(C)C)cc2)C	11	Slightly toxic
115	24691-80-3	O=C(Nc1ccccc1)c2c(occ2)C	11	Slightly toxic
116	500008-45-7	c1(n(nc(c1)Br)c1c(cccn1)Cl)C(Nc1c(cc(cc1C(=O)NC)C)Cl)=O	12	Slightly toxic
117	1129-41-5	c1(cc(ccc1)C)OC(NC)=O	12	Slightly toxic
118	2687-94-7	N1(C(CCC1)=O)CCCCCCCC	12.3	Slightly toxic
119	318290-98-1	C1=C(SC(=N1)S(=O)(=O)CCC(=C(F)F)F)Cl	13	Slightly toxic
120	42609-73-4	CN(C(=O)NC(C)(C)c1ccccc1)c2ccccc2	14	Slightly toxic
121	2905-69-3	O=C(OC)c1cc(Cl)ccc1Cl	14.4	Slightly toxic
122	26087-47-8	O=P(SCc1ccccc1)(OC(C)C)OC(C)C	14.7	Highly toxic
123	38083-17-9	CC(C)(C)C(=O)C(Oc1ccc(Cl)cc1)n2ccnc2	15	Slightly toxic
124	34123-59-6	O=C(Nc1ccc(cc1)C(C)C)N(C)C	18	Slightly toxic
125	34363-01-4	C([C@@H]1CCC(C)=CC1)(C)C.C([C@@H]1CCC(C)=CC1)(C)C	20	Slightly toxic
126	554-00-7	Clc1cc(Cl)c(N)cc1	20	Slightly toxic
127	67708-83-2	ClCC(Br)CBr	20	Slightly toxic
128	37244-68-1	CCS(=O)CSP(=S)(OC(C)C)OC(C)C	20	Slightly toxic
129	52-51-7	OCC([N+]([O-])=O)(Br)CO	20	Slightly toxic
130	2631-40-5	O=C(Oc1ccccc1C(C)C)NC	22	Slightly toxic
131	113036-87-6	O=C(Nc1nc(OC(F)F)cc(OC(F)F)n1)NS(=O)(=O)c2ccccc2C(=O)	24	Slightly toxic
132	84332-86-5	CCOC(=O)C1(C)OC(=O)N(C1=O)c2cc(Cl)cc(Cl)c2	27.5	Slightly toxic
133	86347-14-0	[nH]1cnc(c1)[C@@H](C)c1cccc(c1C)C	30	Slightly toxic
134	76280-91-6	Clc1c(c(c(Cl)c(Cl)c1Cl)C(=O)O)C(=O)Nc2cccc(Cl)c2Cl	30	Slightly toxic
135	82211-24-3	c1cnccc1C(=O)Nc1ccc(Cl)cc1[C@@H](O)c1ccccc1	30	Slightly toxic
136	75-07-0	C(C)=O	30.8	Slightly toxic
137	506-87-6	O=C(O)O.N.N	37	Slightly toxic
138	19408-46-9	O1[C@H](C)[C@@H](NC(=N)C(O)=O)C[C@@H](N)[C@H]1O[C@H]1[C@H](O)[C@@H](O)[C@@H](O)[C@@H](O)[C@@H]1O.Cl	40	Slightly toxic
139	2674-91-1	CCS(=O)CC(C)SP(=O)(OC)OC	40	Slightly toxic
140	108-60-1	O([C@@H](CCl)C)[C@@H](CCl)C	40	Slightly toxic
141	1918-13-4	NC(=S)c1c(Cl)cccc1Cl	41	Slightly toxic
142	56-23-5	C(Cl)(Cl)(Cl)Cl	43	Slightly toxic
143	631-61-8	O=C(O)C.N	43	Slightly toxic
144	30043-49-3	O=S(=O)(c1nnc(s1)N(C(=O)NC)C)CC	44	Slightly toxic
145	211867-47-9	O=C(\C=C(\c1ccc(F)cc1)c2ccc(OC)c(OC)c2)N3CCOCC3	45.12	Slightly toxic
146	99-87-6	c1(C(C)C)ccc(C)cc1	48	Slightly toxic
147	75-20-7	[C-]#[C-].[Ca+2]	50	Slightly toxic
148	96-18-4	C(CCl)(CCl)Cl	50.8	Slightly toxic
149	950-10-7	O=P(OCC)(/N=C1\SCC(S1)C)OCC	54.5	Slightly toxic
150	95-16-9	C1=CC=C2C(=C1)N=CS2	64	Slightly toxic
151	951659-40-8	c1cc(ncc1CN(CC(F)F)C2=CC(=O)OC2)Cl	70.5	Slightly toxic
152	126801-58-9	O=C(Nc1nc(cc(OC)n1)OC)NS(=O)(=O)Oc2ccccc2OCC	80	Slightly toxic
153	21351-39-3	O=C(N)N.O=S(=O)(O)O	80	Slightly toxic
154	58011-68-0	c1(c(OS(c2ccc(C)cc2)(=O)=O)n(C)nc1C)C(c1c(cc(Cl)cc1)Cl)=O	92	Slightly toxic
155	2828-42-4	CC(=NOC(=O)Nc1ccccc1)C	93	Slightly toxic
156	71-55-6	CC(Cl)(Cl)Cl	94	Slightly toxic
157	24579-73-5	N(C(OCCC)=O)CCCN(C)C	96.8	Slightly toxic
158	372137-35-4	n1(c(cc(n(c1=O)c1cc(c(cc1F)Cl)C(=O)NS(=O)(=O)[N@@](C)C(C)C)=O)C(F)(F)F)C	98	Slightly toxic
159	3739-38-6	O=C(O)c2cc(Oc1ccccc1)ccc2	99	Slightly toxic
160	1190-28-9	O=C(O)C(SP(=S)(OC)OC)CC(=O)O	99	Slightly toxic
161	16672-87-0	ClCCP(=O)(O)O	100	Nontoxic
162	94-75-7	Clc1cc(Cl)ccc1OCC(=O)O	100	Nontoxic
163	213464-77-8	c1cccc(c1NS(=O)(=O)NC(Nc1nc(cc(n1)OC)OC)=O)C(=O)N(C)C	100	Nontoxic
164	23103-98-2	O=C(Oc1nc(nc(c1C)C)N(C)C)N(C)C	100	Nontoxic
165	135410-20-7	Clc1ncc(cc1)CN(\C(=N\C#N)C)C	100	Nontoxic
166	14807-96-6	[Mg+2].[Mg+2].[Mg+2].[O-][Si]([O-])=O.[O-][Si]([O-])=O.[O-][Si](=O)O.[O-][Si](=O)O	100	Nontoxic
167	110-27-0	CCCCCCCCCCCCCC(=O)OC(C)C	100	Nontoxic
168	7784-40-9	[As](O)(=O)([O-])[O-].[Pb+2]	100	Nontoxic
169	7287-36-7	Clc1ccc(NC(=O)C(C)(C)CCC)cc1	100	Nontoxic
170	1762-95-4	[S-]C#N.[NH4+]	100	Nontoxic
171	67-48-1	[Cl-].OCC[N+](C)(C)C	100	Nontoxic
172	638-59-5	C(CCCCCCCCCC)CCCOC(C)=O	100	Nontoxic
173	6485-55-8	O1C(C)CNCC1C	100	Nontoxic
174	105024-66-6	c1c(cccc1)Oc1cc(CCC[Si](c2ccc(cc2)OCC)(C)C)ccc1F	100	Nontoxic
175	168088-61-7	O=C(O\N=C(/c1ccccc1)c2ccccc2)c5c(Oc3nc(OC)cc(OC)n3)cccc5Oc4nc(OC)cc(OC)n4	100	Nontoxic
176	874195-61-6	CN(c1c(cccc1F)C(=O)c2nc(nc(n2)OC)OC)S(=O)(=O)C(F)F	100	Nontoxic
177	1263133-33-0	C1=CC=[N+]2C(=C1)N(C(=C(C2=O)C3=CC(=CC=C3)C(F)(F)F)[O-])CC4=CN=CN=C4	100	Nontoxic
178	221667-31-8	O=C(c1ccc(cc1)S(=O)(=O)NC(=O)c2ccccc2OC)NC3CC3	106	Nontoxic
179	14816-20-7	Clc1ccccc1C(=N\OP(=S)(OCC)OCC)/C#N	120	Nontoxic
180	12280-03-4	B(=O)OB1OB2OB(OB(OB(O2)OB(O1)OB=O)[O-])[O-].O.O.O.O.[Na+].[Na+]	125	Nontoxic
181	7783-28-0	[NH4+].[NH4+].OP(=O)([O-])[O-]	155	Nontoxic
182	1007-36-9	c1(NC(NC)=O)ccccc1	172	Nontoxic
183	65-85-0	c1(ccccc1)C(O)=O	180	Nontoxic
184	32861-85-1	COC1=C(C=CC(=C1)OC2=C(C=C(C=C2)Cl)Cl)[N+](=O)[O-]	237	Nontoxic
185	78-59-1	C1(CC(=CC(C1)=O)C)(C)C	240	Nontoxic
186	71422-67-8	C1=CC(=C(C(=C1)F)C(=O)NC(=O)NC2=CC(=C(C(=C2)Cl)OC3=C(C=C(C=N3)C(F)(F)F)Cl)Cl)F	300	Nontoxic
187	77732-09-3	O=C2OCCN2N(C(=O)COC)c1c(cccc1C)C	300	Nontoxic
188	62865-36-5	Cc1c(Cl)cc(cc1Cl)c2ccc(=O)[nH]n2	300	Nontoxic
189	467-69-6	O=C(O)C3(O)c1ccccc1c2c3cccc2	318	Nontoxic
190	27355-22-2	O=C1OCc2c1c(Cl)c(Cl)c(Cl)c2Cl	320	Nontoxic
191	2072-71-1	C(C(C(=O)O)N)SC(=O)N	357	Nontoxic
192	15521-65-0	[Ni+2].CN(C)C(=S)[S-].CN(C)C(=S)[S-]	360	Nontoxic
193	162320-67-4	n1nc(nnc1c1c(cccc1F)F)c1c(cccc1)Cl	400	Nontoxic
194	50864-67-0	S=[Ba]	500	Nontoxic
195	108-94-1	C1(CCCCC1)=O	527	Nontoxic
196	2275-23-2	CC(SCCSP(=O)(OC)OC)C(=O)NC	590	Nontoxic
197	7773-06-0	[O-]S(=O)(=O)N.[NH4+]	650	Nontoxic
198	57-55-6	CC(O)CO	710	Nontoxic
199	497-19-8	[Na+].[Na+].[O-]C([O-])=O	850	Nontoxic
200	77-92-9	C(CC(O)=O)(CC(O)=O)(C(O)=O)O	864	Nontoxic
201	3734-33-6	c1(C[N+](CC(Nc2c(cccc2C)C)=O)(CC)CC)ccccc1.c1cccc(c1)C([O-])=O	1000	Nontoxic
202	9004-67-5	COC2OC(COC)[C@@H](O[C@@H]1OC(COC)C(OC)C(OC)C1OC)C(OC)C2OC	1000	Nontoxic
203	13463-67-7	[Ti](=O)=O	1000	Nontoxic
204	109-79-5	C(CC)CS	1100	Nontoxic
205	76-05-1	FC(F)(F)C([O-])=O	1200	Nontoxic
206	1929-88-0	O=C(NC)Nc1nc2ccccc2s1	1300	Nontoxic
207	75-05-8	C(C)#N	1640	Nontoxic
208	13397-24-5	S(=O)(=O)([O-])[O-].O.O.[Ca+2]	1970	Nontoxic
209	55634-91-8	O=C1/C(C(=O)C(C(=O)OC)C(C)(C)C1)=C(/NOC\C=C)CCC	2000	Nontoxic
210	96-24-2	ClCC(O)CO	2150	Nontoxic
211	1332-58-7	[SiH](=O)(O[SiH](=O)O[AlH]=O)O[AlH]=O.O.O	2500	Nontoxic
212	650-51-1	ClC(Cl)(Cl)C(O)=O	3420	Nontoxic
213	872-50-4	C1(N(CCC1)C)=O	4000	Nontoxic
214	107-41-5	C[C@@H](CC(C)(C)O)O	8510	Nontoxic
215	62-56-6	S=C(N)N	10000	Nontoxic
216	11096-45-0	[Na+].[O-]Cl(=O)=O	10000	Nontoxic
217	513-77-9	[Ba+2].[O-]C(=O)[O-]	10000	Nontoxic
218	650-51-1	[Na+].ClC(Cl)(Cl)C([O-])=O	11000	Nontoxic
219	110-88-3	C1OCOCO1	14236	Nontoxic
220	57-13-6	C(N)(N)=O	17500	Nontoxic
221	51308-54-4	c1(CS\C(=N/c2cccnc2)SCCCC)ccc(C(C)(C)C)cc1	21800	Nontoxic
222	60-35-5	C(C)(N)=O	26300	Nontoxic

## Sheet: Others_test
Others_test
No.	CAS No.	SMILES	Toxicity (mg/L)	Classification
1	2595-54-2	O=C(N(C(=O)OCC)C)CSP(=S)(OCC)OCC	0.006	Very highly toxic
2	8065-36-9	C(NC)(=O)Oc1cc([C@@H](CCC)C)ccc1.c1(cc(ccc1)C(CC)CC)OC(NC)=O	0.046	Very highly toxic
3	129558-76-5	c1(nn(c(c1Cl)C(=O)NCc1ccc(cc1)Oc1ccc(cc1)C)C)CC	0.049	Very highly toxic
4	76-87-9	[OH-].c1ccccc1[Sn+](c2ccccc2)c3ccccc3	0.05	Very highly toxic
5	23560-59-0	COP(=O)(OC)OC1=C(Cl)C2C=CCC12	0.056	Very highly toxic
6	2797-51-5	O=C\2c1c(cccc1)C(=O)C(/Cl)=C/2N	0.063	Very highly toxic
7	83164-33-4	Fc1ccc(c(F)c1)NC(=O)c3cccnc3Oc2cccc(c2)C(F)(F)F	0.099	Very highly toxic
8	494793-67-8	O=C(c1c(nn(c1F)C)C)Nc2ccccc2C(C)CC(C)C	0.103	Highly toxic
9	183675-82-3	n1(cc(C(Nc2ccsc2[C@@H](C)CC(C)C)=O)c(n1)C(F)(F)F)C	0.29	Highly toxic
10	117-80-6	ClC1=C(Cl)C(=O)c2ccccc2C1=O	0.31	Highly toxic
11	900-95-8	CC(=O)O[Sn](C1=CC=CC=C1)(C2=CC=CC=C2)C3=CC=CC=C3	0.32	Highly toxic
12	66441-23-4	O=C(OCC)C(Oc3ccc(Oc1nc2ccc(Cl)cc2o1)cc3)C	0.48	Highly toxic
13	8028-48-6	C=C(\C1C/C=C(/C)CC1)C	0.702	Highly toxic
14	84478-52-4	C1(N(C(C=2CCCCC12)=O)c1c(cc(c(c1)O[C@@H](C#C)C)Cl)F)=O	1	Moderately toxic
15	950782-86-2	Cc1ccc2c(c1)C(C(C2)C)Nc3nc(nc(n3)N)C(C)F	1	Moderately toxic
16	112-53-8	OCCCCCCCCCCCC	1.01	Moderately toxic
17	470-90-6	CCOP(=O)(OCC)OC(=CCl)C1=C(C=C(C=C1)Cl)Cl	1.1	Moderately toxic
18	85785-20-2	O=C(SCc1ccccc1)N(C(C)C(C)C)CC	1.52	Moderately toxic
19	128639-02-1	n1(c(n(C(F)F)c(n1)C)=O)c1cc(C[C@@H](C(=O)OCC)Cl)c(cc1F)Cl	1.6	Moderately toxic
20	15263-53-3	CN(C)C(CSC(=O)N)CSC(=O)N	1.6	Moderately toxic
21	3766-81-2	O=C(Oc1ccccc1C(C)CC)NC	1.7	Moderately toxic
22	203313-25-1	O(C(OCC)=O)C=1[C@@]2(CC[C@H](CC2)OC)NC(=O)C1c1cc(ccc1C)C	1.96	Moderately toxic
23	2275-14-1	Clc1ccc(Cl)cc1SCSP(=S)(OCC)OCC	3.5	Moderately toxic
24	120-51-4	c1(C(OCc2ccccc2)=O)ccccc1	4.6	Moderately toxic
25	41205-21-4	c1cc(F)ccc1N1C(=O)C(Cl)=C(Cl)C1=O	5.6	Moderately toxic
26	41643-35-0	CCN(CC)C(=O)[C@@H](C)Oc1cccc2c1cccc2	6.6	Moderately toxic
27	36756-79-3	O=C(SCc1ccccc1)N(C(C)CC)C(C)CC	8	Moderately toxic
28	50-31-7	Clc1c(C(=O)O)c(Cl)ccc1Cl	8.5	Moderately toxic
29	139920-32-4	Clc1cc(ccc1[C@@H](C)NC([C@@H](C#N)C(C)(C)C)=O)Cl	8.8	Moderately toxic
30	122548-33-8	O=C(Nc1nc(OC)cc(OC)n1)NS(=O)(=O)c2c(Cl)nc3ccccn23	10	Slightly toxic
31	412928-75-7	C(COC)(=O)O[C@@H]([C@@H](C)F)c1c(cccn1)S(=O)(=O)NC(=O)Nc1nc(cc(n1)OC)OC	10	Slightly toxic
32	107713-58-6	CCOc1ccc(cc1)C(COCc2cccc(Oc3ccc(Cl)cc3)c2)C(F)(F)F	10	Slightly toxic
33	266-926-4	C(CCCCCCCCCC)CCCCC(O)=O	12	Slightly toxic
34	100-44-7	c1(ccccc1)CCl	12.5	Slightly toxic
35	133408-50-1	O=C(NC)C(=N\OC)\c2ccccc2Oc1ccccc1	18.1	Slightly toxic
36	21689-84-9	CCNc1nc(NC(C)(C)C#N)nc(SC)n1	18.5	Slightly toxic
37	110956-75-7	O=C3O/C(C(=O)N3c2c(F)cc(Cl)c(OC1CCCC1)c2)=C(/C)C	21.4	Slightly toxic
38	1314-84-7	P([Zn]P=[Zn])=[Zn]	21.7	Slightly toxic
39	640-19-7	FCC(=O)N	40	Slightly toxic
40	2655-14-3	O=C(Oc1cc(cc(c1)C)C)NC	40	Slightly toxic
41	7664-93-9	O=S(=O)(O)O	42	Slightly toxic
42	5221-53-4	CCCCc1c(C)nc(nc1O)N(C)C	42	Slightly toxic
43	99485-76-4	c1(CNC(=O)NC(c2ccccc2)(C)C)ccccc1Cl	50	Slightly toxic
44	467430-42-8	CC(N(C(=O)COC)c1c(C)cccc1C)C(=O)O	100	Nontoxic
45	13598-36-2	OP(O)=O	100	Nontoxic
46	50-30-6	c1(c(cccc1Cl)Cl)C(O)=O	130	Nontoxic
47	107-06-2	ClCCCl	136	Nontoxic
48	7085-19-0	Clc1cc(c(OC(C(=O)O)C)cc1)C	240	Nontoxic
49	1305-62-0	[Ca+2].[OH-].[OH-]	240	Nontoxic
50	557-30-2	O=CC=O	760	Nontoxic
51	1344-00-9	[Na+].[Al+3].[O-].[Si]([O-])=O.[O-][Si]([O-])=O	1000	Nontoxic
52	26644-46-2	ClC(Cl)(Cl)C(N1CCN(C(NC=O)C(Cl)(Cl)Cl)CC1)NC=O	1000	Nontoxic
53	25366-23-8	FC(F)(F)c1nnc(s1)N(C(=O)NC)C	1000	Nontoxic
54	18467-77-1	O=C(O)C21OC(OC1C3OC(OCC3O2)(C)C)(C)C	5000	Nontoxic
55	7631-86-9	O=[Si]=O	10000	Nontoxic
56	1317-65-3	C(=O)([O-])[O-].[Ca+2]	56000	Nontoxic
