# Supplementary material for: In silico prediction of pesticide aquatic toxicity with chemical category approaches
Source: Royal Society of Chemistry journal article supplement (doi:10.1039/c7tx00144d), 2017-01-01
Supplement: c7tx00144d2.xlsx [file c7tx00144d2.xlsx]

## Sheet: RT_Binary classificatrion
Table SI2: The results of binary and ternary classification models
Performance of 54 binary classification models for the ten-fold cross validation using different fingerprints and modeling methodsa for RT
FP_method	AUC	CA	SP	SE
FP_KNN	0.87	0.79	0.75	0.83
FP_SVM	0.9	0.83	0.82	0.84
FP_ANN	0.88	0.81	0.79	0.82
FP_RF	0.89	0.8	0.83	0.77
FP_NB	0.72	0.65	0.77	0.54
FP_CT	0.74	0.74	0.74	0.75
Sub_KNN	0.9	0.8	0.72	0.87
Sub_SVM	0.89	0.83	0.82	0.84
SuP_ANN	0.9	0.83	0.82	0.83
Sub_RF	0.89	0.8	0.79	0.81
Sub_NB	0.81	0.73	0.78	0.68
Sub_CT	0.81	0.8	0.78	0.82
Ext_KNN	0.87	0.78	0.76	0.81
Ext_SVM	0.9	0.84	0.82	0.85
Ext_ANN	0.88	0.81	0.79	0.82
Ext_RF	0.88	0.79	0.82	0.77
Ext_NB	0.72	0.65	0.75	0.57
Ext_CT	0.72	0.73	0.7	0.75
Graph_KNN	0.93	0.87	0.85	0.88
Graph_SVM	0.95	0.89	0.89	0.89
Graph_ANN	0.93	0.86	0.84	0.88
Graph_RF	0.94	0.86	0.89	0.83
Graph_NB	0.79	0.72	0.91	0.55
Graph_CT	0.84	0.81	0.82	0.8
Pub_KNN	0.91	0.83	0.81	0.84
Pub_SVM	0.93	0.88	0.87	0.89
Pub_ANN	0.94	0.88	0.87	0.88
Pub_RF	0.93	0.83	0.85	0.81
Pub_NB	0.79	0.7	0.83	0.6
Pub_CT	0.83	0.8	0.73	0.86
KR_KNN	0.92	0.84	0.82	0.85
KR_SVM	0.94	0.89	0.89	0.89
KR_ANN	0.91	0.86	0.87	0.85
KR_RF	0.92	0.83	0.85	0.82
KR_NB	0.84	0.79	0.86	0.72
KR_CT	0.71	0.72	0.51	0.91
Maccs_KNN	0.94	0.87	0.85	0.88
Maccs_SVM	0.94	0.89	0.89	0.9
Maccs_ANN	0.95	0.9	0.9	0.89
Maccs_RF	0.94	0.87	0.9	0.83
Maccs_NB	0.76	0.67	0.85	0.52
Maccs_CT	0.81	0.82	0.78	0.85
Est_KNN	0.89	0.8	0.76	0.83
Est_SVM	0.92	0.84	0.81	0.86
Est_ANN	0.92	0.84	0.83	0.86
Est_RF	0.9	0.81	0.8	0.82
Est_NB	0.82	0.74	0.76	0.71
Est_CT	0.8	0.8	0.79	0.8
AP2D_KNN	0.91	0.83	0.8	0.86
AP2D_SVM	0.93	0.86	0.85	0.88
AP2D_ANN	0.92	0.86	0.85	0.88
AP2D_RF	0.92	0.83	0.8	0.86
AP2D_NB	0.78	0.71	0.76	0.66
AP2D_CT	0.86	0.84	0.85	0.82
Performance of top 20 binary classification models of RT for the external validation set
FP_method	AUC	CA	SP	SE
Maccs_ANN	0.88	0.81	0.81	0.82
Maccs_SVM	0.89	0.81	0.78	0.84
KR_SVM	0.87	0.81	0.77	0.84
Est_SVM	0.89	0.81	0.82	0.79
Ext_SVM	0.83	0.8	0.85	0.75
Maccs_CT	0.78	0.78	0.73	0.82
FP_SVM	0.84	0.77	0.81	0.74
FP_RF	0.85	0.77	0.84	0.72
Ext_RF	0.84	0.77	0.83	0.72
Pub_SVM	0.86	0.77	0.81	0.73
Est_ANN	0.85	0.77	0.77	0.76
AP2D_SVM	0.85	0.77	0.81	0.73
Sub_RF	0.85	0.76	0.66	0.85
Ext_ANN	0.81	0.76	0.77	0.75
Graph_SVM	0.84	0.76	0.81	0.72
Pub_ANN	0.83	0.76	0.81	0.72
Pub_RF	0.87	0.76	0.86	0.67
KR_RF	0.87	0.76	0.83	0.7
Maccs_KNN	0.83	0.76	0.74	0.78
Est_KNN	0.82	0.75	0.73	0.78

## Sheet: LP_Binary classificatrion
Performance of 54 binary classification models for the ten-fold cross validation using different fingerprints and modeling methodsa for LP
FP_method	AUC	CA	SP	SE
FP_KNN	0.78	0.72	0.63	0.83
FP_SVM	0.88	0.81	0.87	0.73
FP_ANN	0.86	0.8	0.84	0.76
FP_RF	0.83	0.75	0.85	0.61
FP_NB	0.69	0.67	0.75	0.57
FP_CT	0.59	0.6	0.64	0.53
Sub_KNN	0.9	0.84	0.86	0.83
Sub_SVM	0.92	0.84	0.89	0.77
SuP_ANN	0.86	0.83	0.87	0.77
Sub_RF	0.87	0.7	0.95	0.36
Sub_NB	0.79	0.8	0.84	0.74
Sub_CT	0.83	0.83	0.82	0.84
Ext_KNN	0.84	0.76	0.69	0.84
Ext_SVM	0.92	0.84	0.9	0.76
Ext_ANN	0.89	0.82	0.88	0.73
Ext_RF	0.83	0.73	0.87	0.54
Ext_NB	0.72	0.69	0.79	0.54
Ext_CT	0.68	0.69	0.76	0.6
Graph_KNN	0.91	0.85	0.89	0.79
Graph_SVM	0.93	0.88	0.94	0.79
Graph_ANN	0.92	0.86	0.9	0.8
Graph_RF	0.93	0.85	0.92	0.76
Graph_NB	0.79	0.72	0.83	0.57
Graph_CT	0.74	0.73	0.68	0.8
Pub_KNN	0.88	0.8	0.84	0.76
Pub_SVM	0.94	0.86	0.9	0.81
Pub_ANN	0.94	0.85	0.87	0.83
Pub_RF	0.93	0.82	0.9	0.71
Pub_NB	0.74	0.71	0.83	0.54
Pub_CT	0.74	0.74	0.72	0.76
KR_KNN	0.9	0.86	0.85	0.87
KR_SVM	0.94	0.89	0.91	0.87
KR_ANN	0.93	0.86	0.9	0.8
KR_RF	0.89	0.71	0.96	0.37
KR_NB	0.82	0.8	0.88	0.69
KR_CT	0.76	0.78	0.86	0.67
Maccs_KNN	0.92	0.85	0.86	0.83
Maccs_SVM	0.96	0.9	0.8	0.89
Maccs_ANN	0.94	0.88	0.88	0.87
Maccs_RF	0.91	0.82	0.92	0.69
Maccs_NB	0.84	0.77	0.84	0.69
Maccs_CT	0.73	0.73	0.76	0.7
Est_KNN	0.87	0.8	0.92	0.63
Est_SVM	0.87	0.81	0.87	0.73
Est_ANN	0.85	0.8	0.87	0.71
Est_RF	0.86	0.71	0.93	0.4
Est_NB	0.77	0.71	0.74	0.67
Est_CT	0.76	0.77	0.82	0.7
AP2D_KNN	0.89	0.85	0.87	0.83
AP2D_SVM	0.93	0.86	0.94	0.76
AP2D_ANN	0.89	0.85	0.88	0.81
AP2D_RF	0.9	0.77	0.87	0.63
AP2D_NB	0.75	0.7	0.85	0.49
AP2D_CT	0.84	0.83	0.82	0.86
Performance of top 20 binary classification models of LP for the external validation set
FP_method	AUC	CA	SP	SE
Est_CT	0.82	0.81	0.89	0.74
AP2D_KNN	0.76	0.79	0.89	0.71
KR_CT	0.77	0.76	0.89	0.65
AP2D_RF	0.74	0.76	0.78	0.74
Graph_NB	0.76	0.74	0.82	0.68
Est_ANN	0.81	0.74	0.78	0.71
Sub_NB	0.7	0.71	0.7	0.71
Ext_SVM	0.72	0.71	0.7	0.71
Graph_KNN	0.73	0.71	0.7	0.71
Maccs_RF	0.76	0.71	0.82	0.61
Est_SVM	0.78	0.71	0.74	0.68
Sub_SVM	0.66	0.69	0.7	0.68
Pub_CT	0.69	0.69	0.63	0.74
Maccs_ANN	0.75	0.69	0.7	0.68
Maccs_CT	0.69	0.69	0.74	0.65
Est_KNN	0.6	0.69	0.7	0.68
Est_NB	0.75	0.69	0.7	0.68
Sub_KNN	0.63	0.67	0.67	0.68
KR_SVM	0.74	0.67	0.7	0.65
FP_ANN	0.68	0.66	0.63	0.68

## Sheet: All_Binary classificatrion
Performance of 54 binary classification models for the ten-fold cross validation using different fingerprints and modeling methodsa for All
FP_method	AUC	CA	SP	SE
FP_KNN	0.85	0.76	0.72	0.79
FP_SVM	0.89	0.81	0.81	0.82
FP_ANN	0.87	0.8	0.79	0.8
FP_RF	0.87	0.79	0.84	0.75
FP_NB	0.69	0.63	0.77	0.51
FP_CT	0.72	0.71	0.7	0.73
Sub_KNN	0.88	0.78	0.75	0.81
Sub_SVM	0.88	0.83	0.84	0.81
SuP_ANN	0.88	0.8	0.82	0.79
Sub_RF	0.86	0.76	0.84	0.69
Sub_NB	0.78	0.7	0.74	0.66
Sub_CT	0.82	0.79	0.8	0.78
Ext_KNN	0.85	0.76	0.72	0.79
Ext_SVM	0.9	0.83	0.82	0.83
Ext_ANN	0.87	0.8	0.78	0.82
Ext_RF	0.87	0.78	0.83	0.72
Ext_NB	0.68	0.65	0.77	0.54
Ext_CT	0.71	0.71	0.7	0.72
Graph_KNN	0.93	0.85	0.85	0.86
Graph_SVM	0.94	0.89	0.89	0.89
Graph_ANN	0.94	0.88	0.89	0.87
Graph_RF	0.93	0.86	0.89	0.83
Graph_NB	0.75	0.69	0.9	0.49
Graph_CT	0.84	0.79	0.87	0.72
Pub_KNN	0.89	0.82	0.81	0.82
Pub_SVM	0.92	0.86	0.87	0.86
Pub_ANN	0.93	0.85	0.85	0.86
Pub_RF	0.92	0.83	0.87	0.78
Pub_NB	0.77	0.69	0.83	0.56
Pub_CT	0.83	0.78	0.81	0.76
KR_KNN	0.9	0.81	0.79	0.84
KR_SVM	0.92	0.87	0.87	0.88
KR_ANN	0.89	0.83	0.83	0.84
KR_RF	0.89	0.81	0.86	0.77
KR_NB	0.81	0.77	0.84	0.7
KR_CT	0.76	0.75	0.9	0.61
Maccs_KNN	0.92	0.84	0.85	0.84
Maccs_SVM	0.93	0.86	0.88	0.85
Maccs_ANN	0.94	0.87	0.87	0.86
Maccs_RF	0.92	0.84	0.9	0.78
Maccs_NB	0.73	0.67	0.84	0.51
Maccs_CT	0.79	0.79	0.78	0.79
Est_KNN	0.87	0.78	0.76	0.79
Est_SVM	0.89	0.82	0.82	0.82
Est_ANN	0.89	0.81	0.8	0.81
Est_RF	0.88	0.78	0.83	0.74
Est_NB	0.79	0.72	0.74	0.7
Est_CT	0.8	0.77	0.77	0.78
AP2D_KNN	0.91	0.85	0.82	0.87
AP2D_SVM	0.91	0.87	0.9	0.84
AP2D_ANN	0.93	0.86	0.86	0.86
AP2D_RF	0.91	0.82	0.82	0.82
AP2D_NB	0.74	0.68	0.76	0.6
AP2D_CT	0.85	0.79	0.75	0.83
Performance of top 20 binary classification models of All for the external validation set
FP_method	AUC	CA	SP	SE
Maccs_ANN	0.89	0.83	0.83	0.82
Est_SVM	0.88	0.82	0.86	0.8
Maccs_SVM	0.85	0.82	0.88	0.78
KR_SVM	0.85	0.81	0.86	0.77
Pub_SVM	0.83	0.81	0.87	0.76
KR_RF	0.84	0.79	0.86	0.72
FP_SVM	0.84	0.78	0.81	0.75
Graph_SVM	0.85	0.78	0.81	0.75
Est_KNN	0.82	0.78	0.82	0.74
Maccs_RF	0.85	0.77	0.87	0.69
Ext_SVM	0.83	0.77	0.8	0.75
FP_RF	0.83	0.77	0.85	0.7
Ext_ANN	0.82	0.77	0.77	0.77
FP_KNN	0.82	0.76	0.8	0.74
Maccs_KNN	0.83	0.76	0.78	0.75
Graph_ANN	0.85	0.76	0.78	0.75
Pub_RF	0.86	0.76	0.83	0.7
Pub_KNN	0.78	0.76	0.8	0.72
Ext_RF	0.82	0.75	0.83	0.69
KR_ANN	0.84	0.75	0.76	0.74

## Sheet: Others_Binary classificatrion
Performance of 54 binary classification models for the ten-fold cross validation using different fingerprints and modeling methodsa for Others
FP_method	AUC	CA	SP	SE
FP_KNN	0.79	0.73	0.62	0.84
FP_SVM	0.86	0.78	0.77	0.79
FP_ANN	0.82	0.75	0.73	0.77
FP_RF	0.83	0.74	0.82	0.68
FP_NB	0.71	0.62	0.8	0.46
FP_CT	0.69	0.68	0.68	0.69
Sub_KNN	0.84	0.78	0.74	0.81
Sub_SVM	0.85	0.78	0.77	0.79
SuP_ANN	0.85	0.79	0.8	0.78
Sub_RF	0.83	0.71	0.7	0.72
Sub_NB	0.72	0.68	0.69	0.68
Sub_CT	0.77	0.76	0.78	0.75
Ext_KNN	0.8	0.72	0.63	0.8
Ext_SVM	0.84	0.77	0.77	0.76
Ext_ANN	0.83	0.74	0.73	0.75
Ext_RF	0.84	0.72	0.8	0.65
Ext_NB	0.7	0.61	0.79	0.45
Ext_CT	0.73	0.72	0.77	0.68
Graph_KNN	0.9	0.82	0.8	0.84
Graph_SVM	0.89	0.82	0.8	0.84
Graph_ANN	0.88	0.81	0.8	0.82
Graph_RF	0.88	0.78	0.82	0.75
Graph_NB	0.76	0.69	0.88	0.51
Graph_CT	0.75	0.74	0.69	0.78
Pub_KNN	0.87	0.81	0.8	0.82
Pub_SVM	0.89	0.82	0.82	0.83
Pub_ANN	0.86	0.8	0.8	0.8
Pub_RF	0.87	0.75	0.77	0.72
Pub_NB	0.7	0.67	0.68	0.67
Pub_CT	0.7	0.7	0.66	0.73
KR_KNN	0.87	0.79	0.76	0.82
KR_SVM	0.87	0.82	0.83	0.81
KR_ANN	0.88	0.79	0.77	0.8
KR_RF	0.82	0.73	0.7	0.75
KR_NB	0.82	0.78	0.8	0.75
KR_CT	0.74	0.74	0.75	0.73
Maccs_KNN	0.86	0.81	0.75	0.85
Maccs_SVM	0.89	0.81	0.79	0.82
Maccs_ANN	0.86	0.8	0.77	0.82
Maccs_RF	0.86	0.75	0.83	0.68
Maccs_NB	0.64	0.65	0.81	0.51
Maccs_CT	0.73	0.73	0.69	0.77
Est_KNN	0.82	0.73	0.69	0.78
Est_SVM	0.83	0.75	0.72	0.77
Est_ANN	0.83	0.74	0.75	0.74
Est_RF	0.81	0.7	0.75	0.66
Est_NB	0.72	0.66	0.68	0.64
Est_CT	0.74	0.73	0.74	0.72
AP2D_KNN	0.87	0.81	0.78	0.84
AP2D_SVM	0.91	0.83	0.87	0.8
AP2D_ANN	0.86	0.8	0.77	0.83
AP2D_RF	0.85	0.76	0.8	0.72
AP2D_NB	0.78	0.7	0.71	0.7
AP2D_CT	0.78	0.78	0.74	0.82
Performance of top 20 binary classification models of Others for the external validation set
FP_method	AUC	CA	SP	SE
Graph_ANN	0.74	0.74	0.78	0.71
Pub_CT	0.71	0.71	0.74	0.69
AP2D_RF	0.75	0.71	0.7	0.71
Graph_KNN	0.74	0.69	0.67	0.71
Est_RF	0.68	0.69	0.67	0.71
AP2D_SVM	0.74	0.68	0.82	0.57
AP2D_ANN	0.68	0.68	0.7	0.66
Graph_RF	0.69	0.66	0.67	0.66
Pub_SVM	0.7	0.66	0.59	0.71
KR_SVM	0.68	0.66	0.7	0.63
Maccs_ANN	0.72	0.66	0.59	0.71
Est_ANN	0.68	0.66	0.59	0.71
Est_NB	0.66	0.66	0.7	0.63
Ext_KNN	0.68	0.65	0.59	0.69
Graph_SVM	0.74	0.65	0.63	0.66
Graph_CT	0.63	0.65	0.48	0.77
Pub_ANN	0.66	0.65	0.67	0.63
Pub_RF	0.73	0.65	0.74	0.57
KR_KNN	0.66	0.65	0.63	0.66
KR_ANN	0.64	0.65	0.67	0.63

## Sheet: All_ternary classification
Performance of 54 ternary classification models for the ten-fold cross validation using different fingerprints and modeling methodsa for All
FP_method	AUC	CA	SE_0	SE_1	SE_2
FP_KNN	0.84	0.67	0.52	0.77	0.65
FP_SVM	0.89	0.73	0.59	0.8	0.73
FP_ANN	0.85	0.7	0.58	0.73	0.73
FP_RF	0.86	0.66	0.51	0.83	0.54
FP_NB	0.72	0.54	0.68	0.48	0.53
FP_CT	0.72	0.59	0.48	0.63	0.61
Sub_KNN	0.87	0.71	0.61	0.74	0.76
Sub_SVM	0.89	0.74	0.6	0.81	0.74
SuP_ANN	0.86	0.72	0.6	0.76	0.75
Sub_RF	0.86	0.62	0.31	0.81	0.57
Sub_NB	0.79	0.59	0.41	0.63	0.68
Sub_CT	0.83	0.72	0.6	0.75	0.77
Ext_KNN	0.84	0.68	0.5	0.79	0.67
Ext_SVM	0.89	0.73	0.58	0.82	0.7
Ext_ANN	0.85	0.7	0.59	0.74	0.71
Ext_RF	0.87	0.69	0.53	0.84	0.57
Ext_NB	0.72	0.52	0.71	0.42	0.54
Ext_CT	0.72	0.6	0.49	0.64	0.61
Graph_KNN	0.9	0.77	0.67	0.79	0.81
Graph_SVM	0.92	0.81	0.67	0.89	0.8
Graph_ANN	0.91	0.79	0.71	0.81	0.82
Graph_RF	0.92	0.75	0.66	0.83	0.71
Graph_NB	0.78	0.54	0.72	0.51	0.44
Graph_CT	0.83	0.71	0.5	0.85	0.67
Pub_KNN	0.88	0.72	0.59	0.79	0.72
Pub_SVM	0.92	0.77	0.65	0.84	0.77
Pub_ANN	0.89	0.75	0.69	0.75	0.78
Pub_RF	0.91	0.72	0.6	0.83	0.66
Pub_NB	0.76	0.58	0.63	0.57	0.55
Pub_CT	0.83	0.72	0.55	0.8	0.75
KR_KNN	0.88	0.71	0.69	0.73	0.71
KR_SVM	0.91	0.77	0.66	0.83	0.76
KR_ANN	0.89	0.74	0.7	0.75	0.78
KR_RF	0.88	0.67	0.46	0.81	0.62
KR_NB	0.81	0.66	0.58	0.71	0.65
KR_CT	0.66	0.6	0.3	0.93	0.31
Maccs_KNN	0.9	0.75	0.69	0.78	0.76
Maccs_SVM	0.91	0.79	0.65	0.85	0.82
Maccs_ANN	0.9	0.76	0.68	0.79	0.8
Maccs_RF	0.91	0.75	0.67	0.85	0.66
Maccs_NB	0.73	0.52	0.6	0.48	0.5
Maccs_CT	0.81	0.71	0.65	0.73	0.73
Est_KNN	0.86	0.67	0.54	0.72	0.69
Est_SVM	0.87	0.7	0.55	0.78	0.7
Est_ANN	0.85	0.67	0.58	0.73	0.64
Est_RF	0.86	0.62	0.25	0.85	0.54
Est_NB	0.76	0.56	0.46	0.59	0.61
Est_CT	0.79	0.66	0.59	0.69	0.67
AP2D_KNN	0.9	0.8	0.72	0.81	0.84
AP2D_SVM	0.93	0.8	0.65	0.88	0.81
AP2D_ANN	0.9	0.79	0.67	0.83	0.83
AP2D_RF	0.91	0.73	0.58	0.85	0.67
AP2D_NB	0.73	0.53	0.5	0.61	0.43
AP2D_CT	0.86	0.74	0.59	0.83	0.73
Performance of top 20 ternary classification models of All for the external validation set
FP_method	AUC	CA	SE_0	SE_1	SE_2
Pub_SVM	0.85	0.67	0.67	0.67	0.68
Est_SVM	0.84	0.66	0.61	0.7	0.62
KR_SVM	0.84	0.65	0.62	0.69	0.59
Pub_KNN	0.79	0.65	0.58	0.66	0.68
FP_SVM	0.81	0.63	0.63	0.66	0.59
AP2D_RF	0.84	0.63	0.55	0.69	0.6
Est_KNN	0.78	0.62	0.6	0.62	0.64
Sub_SVM	0.79	0.62	0.62	0.68	0.51
Sub_RF	0.83	0.62	0.4	0.76	0.57
Ext_SVM	0.81	0.62	0.59	0.63	0.61
KR_RF	0.82	0.61	0.46	0.73	0.55
Maccs_RF	0.82	0.61	0.55	0.71	0.5
Maccs_KNN	0.78	0.61	0.59	0.61	0.6
Pub_ANN	0.76	0.6	0.67	0.6	0.55
Est_RF	0.82	0.6	0.32	0.81	0.51
Pub_RF	0.81	0.6	0.7	0.61	0.49
Ext_RF	0.82	0.59	0.53	0.71	0.46
KR_KNN	0.79	0.59	0.59	0.61	0.58
Ext_KNN	0.79	0.59	0.58	0.68	0.45
Graph_SVM	0.81	0.59	0.48	0.69	0.51
